# Supplementary material for: The Human Lung Glycome Reveals Novel Glycan Ligands for Influenza A Virus
Source: PubMed Central journal article supplement (PMC7093477; doi:10.1038/s41598-020-62074-z), 2020-03-24
Supplement: 41598_2020_62074_MOESM1_ESM.pdf [file 41598_2020_62074_MOESM1_ESM.pdf]

Supporting information for

## **The Human Lung Glycome Reveals Novel Glycan Ligands for Influenza A Virus**

Nan Jia<sup>1,†</sup>, Lauren Byrd-Leotis<sup>1,3,†</sup>, Yasuyuki Matsumoto<sup>1</sup>, Chao Gao<sup>1,3</sup>, Alexander N. Wein<sup>2</sup>, Jenna L. Lobby<sup>2</sup>, Jacob E. Kohlmeier<sup>2</sup>, David A. Steinhauer<sup>2,3,\*</sup>, Richard D. Cummings<sup>1,3,\*</sup>

<sup>1</sup>Beth Israel Deaconess Medical Center, Department of Surgery and Harvard Medical School Center for Glycoscience, Harvard Medical School, Boston, MA, USA

<sup>2</sup>Department of Microbiology and Immunology, Emory University School of Medicine Atlanta, GA, USA

<sup>3</sup>Emory-UGA Center of Excellence of Influenza Research and Surveillance, (CEIRS) Atlanta GA, USA

\*Corresponding Authors:

David Steinhauer: [dsteinh@emory.edu](mailto:dsteinh@emory.edu)

Richard Cummings: [rcummin1@bidmc.harvard.edu](mailto:rcummin1@bidmc.harvard.edu)

†Contributed equally.

Supplementary Figures S1-S9

Supplementary Tables S1-S5

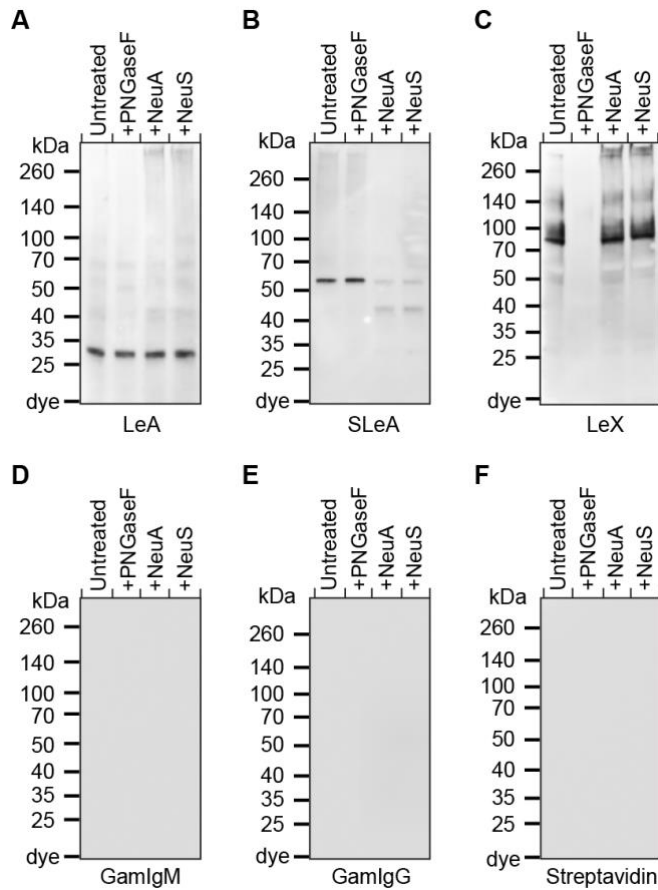

**Supplementary Fig. 1 Western blot of human lung for detection of Lewis glycan epitopes.** Tissue homogenate in human lung were treated with PNGase F (PNGaseF), Neuraminidase A (NeuA), or Neuraminidase S (NeuS), and separated by SDS-PAGE. The gel was analyzed by Western blot using antibodies against LeA (a), SLeA (b) and LeX (c). HRP-conjugated goat anti-mouse IgM (d), goat anti-mouse IgG (e), and Streptavidin (f) were used as quality control.

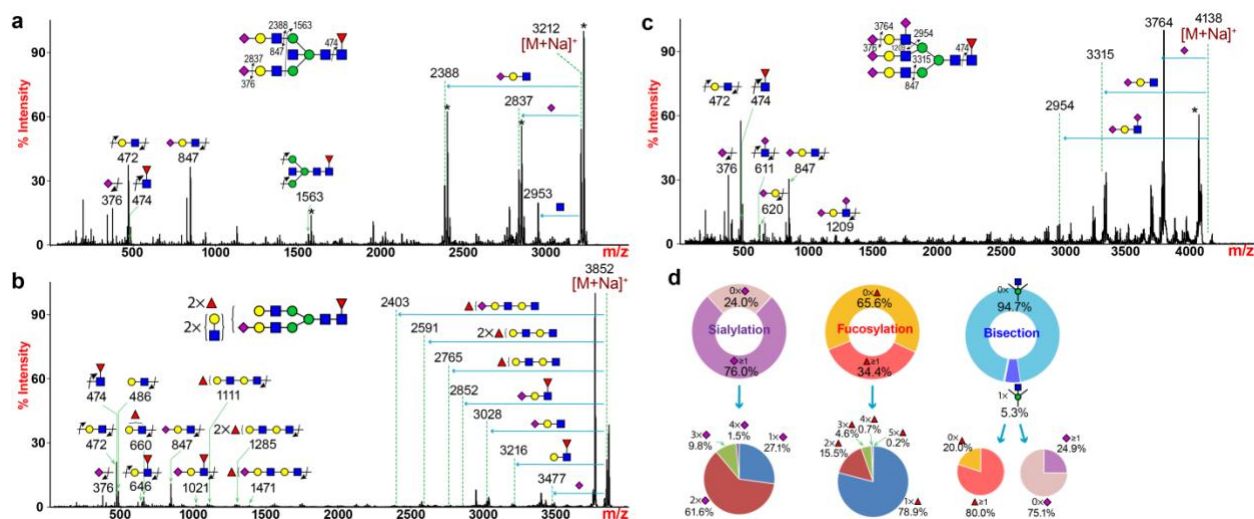

**Supplementary Fig. 2 Further structural interrogation of human lung N-glycans.** (a) MALDI-TOF/TOF-MS/MS analysis of a permethylated human lung N-glycan at m/z 3212 confirmed the expression of a bisecting GlcNAc. The fragment ion at m/z 1563 was generated from double-cleavage fragmentation, which indicated a GlcNAc residue was attached to the tri-mannosyl core. The loss of a terminal GlcNAc was confirmed by the detection of Y-ion at m/z 2953. (b) MALDI-TOF/TOF-MS/MS analysis of a permethylated human lung N-glycan at m/z 3852 confirmed the expression of Lewis antigens. The B-ion at m/z 660 represented a fucosylated LacNAc trisaccharide fragment ion, which indicated the expression of an H antigen or a terminal LeX antigen. The expression of SLeX was also detected which was confirmed by the B-ion at m/z 1021 together with its corresponding Y-ion at 2852. Detection of a double cleavage ion at m/z 646 suggested the presence of internal LeX motif as well as SLeX. (c) MALDI-TOF/TOF-MS/MS analysis of a permethylated human lung N-glycan at m/z 4138 confirmed the Neu5Ac-GlcNAc sequence. The addition of a fourth sialic acid on the GlcNAc of a LacNAc unit was confirmed by the presence of the fragment ion at m/z 611. The MS/MS spectra of all three molecular ions confirmed core-fucosylation as illustrated by the fragment ion at m/z 474. (d) The doughnut charts represented the relative quantitation of human lung complex N-glycans with sialylation, fucosylation or bisection. The percentage was defined as the sum of relative intensities carrying that specific structural feature divide by the sum of relative intensities of total glycans. Glycans with more than one sialic acid or fucose residue were further dissected to reflect the proportions carrying various numbers of sialic acid or fucose residues. Bisected glycans were further inspected to show the proportions of sialylated and fucosylated species.

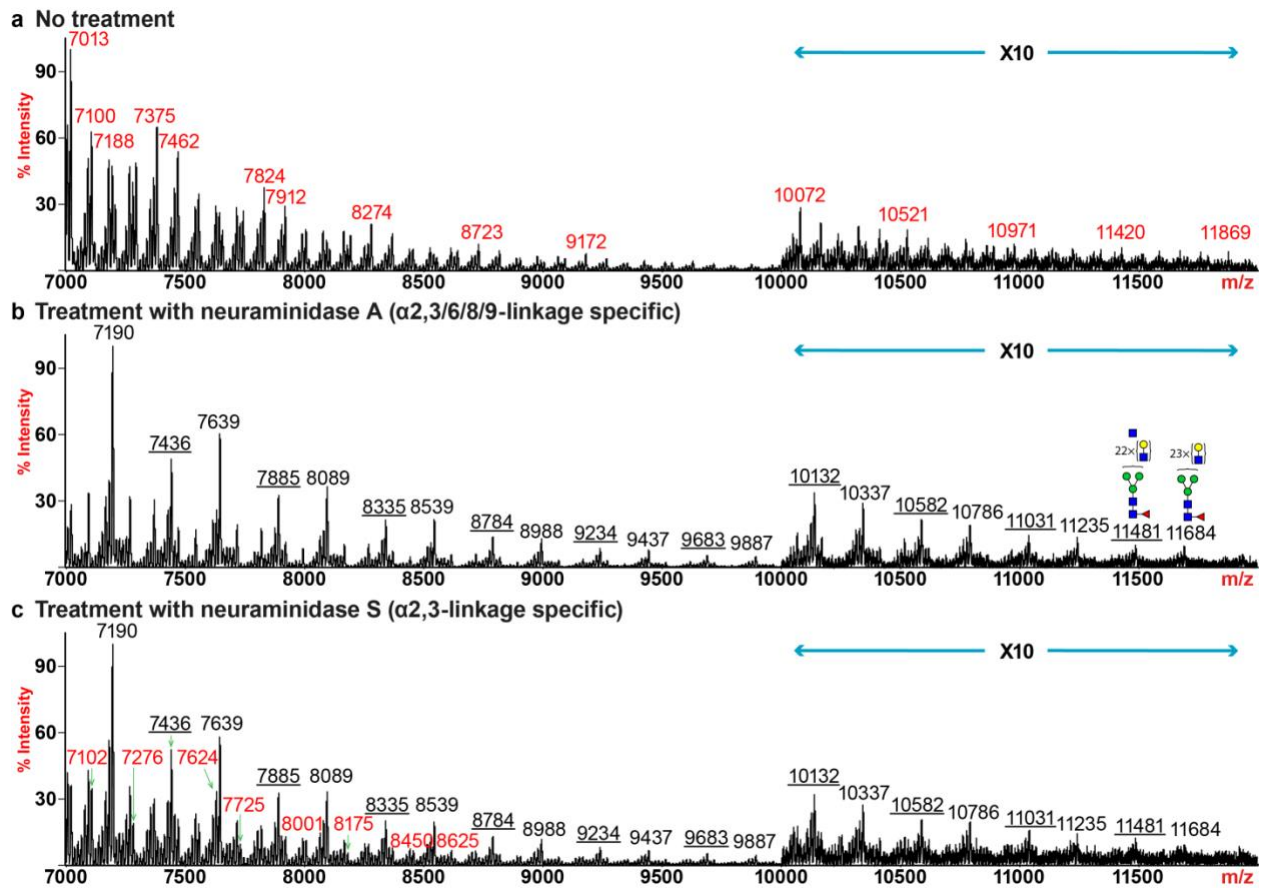

**Supplementary Fig. 3 N-glycan MS profiles of human lung following neuraminidase treatment.** The spectra cover the m/z region between 7000 and 12000. All molecular ions detected represent permethylated species and are present in the form of  $[M+Na]^+$ . (a) MALDI-TOF-MS spectrum of untreated human lung N-glycans. (b) MALDI-TOF-MS spectrum of human lung N-glycans treated with neuraminidase A. (c) MALDI-TOF-MS spectrum of human lung N-glycans treated with neuraminidase S. Peaks representing sialylated glycans are colored in red, non-sialylated glycans are in black and bisected glycans are underlined.

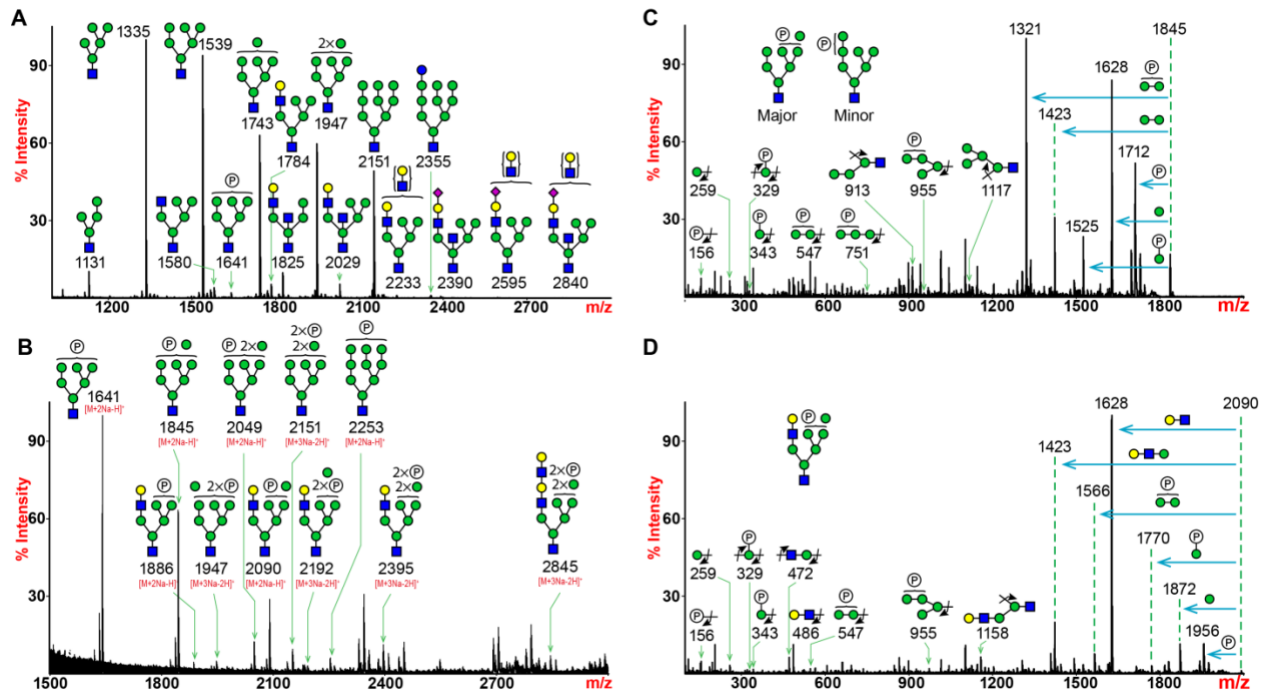

**Supplementary Fig. 4 MS analysis of phosphorylated oligomannose glycans from a human lung.** All molecular ions detected represent permethylated species and are present in the form of singly charged ions with sodium ion adducts. (a) MALDI-TOF-MS spectrum of human lung N-glycans released by an endoglycosidase Endo H, which releases oligomannose- and hybrid-type N-glycans. (b) MALDI-TOF-MS spectrum of human lung phosphorylated N-glycans released by Endo H, followed by de-sialylation and anion exchange chromatography. A phosphate group is symbolled by a circled letter ‘P’. (c) MALDI-TOF/TOF-MS/MS analysis of a permethylated human lung N-glycan at m/z 1845 confirmed the expression of a phosphorylated oligomannose-type structure. (d) MALDI-TOF/TOF-MS/MS analysis of a permethylated human lung N-glycan at m/z 2090 confirmed the expression of a phosphorylated hybrid-type structure.

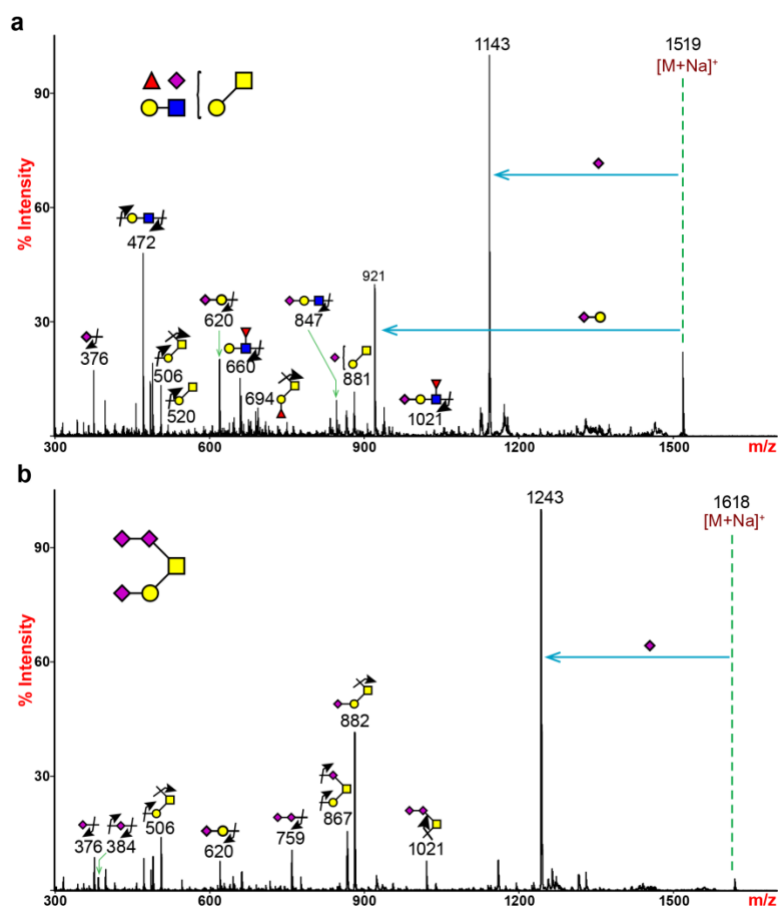

**Supplementary Fig. 5 MALDI-TOF/TOF-MS/MS analysis of human lung O-glycans.** (a) MALDI-TOF/TOF-MS/MS analysis of a permethylated human lung O-glycan at m/z 1519 confirmed the expression of Lewis antigens. (b) MALDI-TOF/TOF-MS/MS analysis of a permethylated human lung O-glycan at m/z 2090 confirmed the expression of a tri-sialylated core 1 structure.



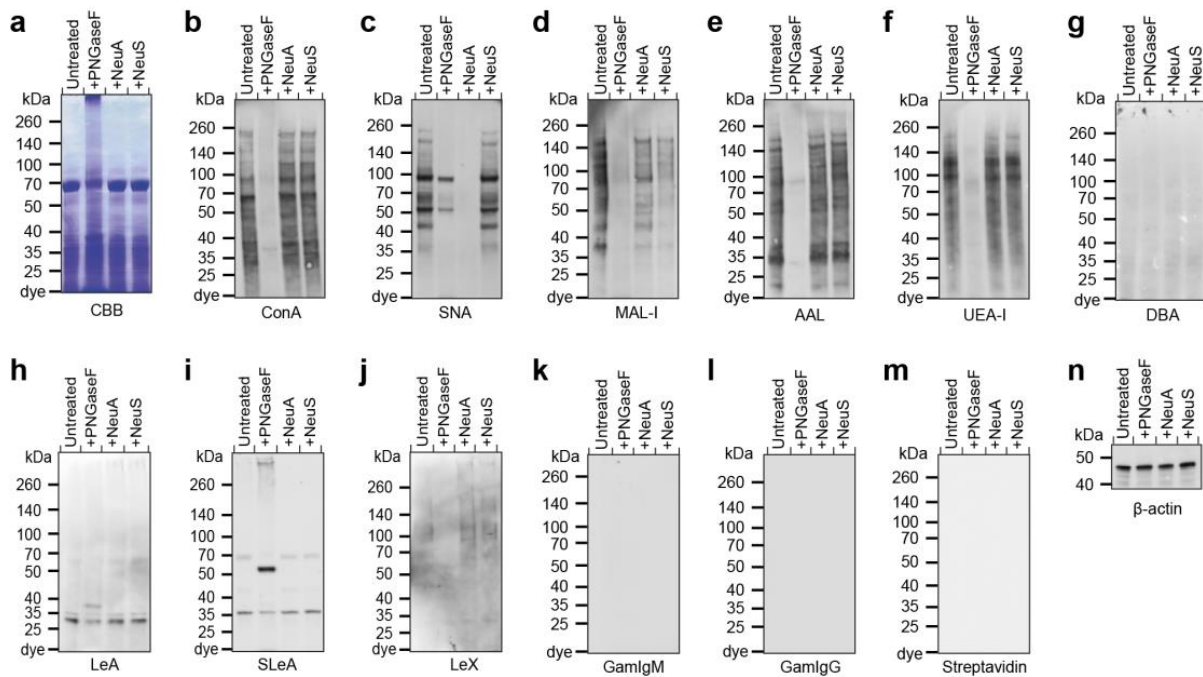

**Supplementary Fig. 7 Western blot of human lung-2.** Tissue homogenate obtained from human lung-2 were treated with PNGase F (PNGaseF), Neuraminidase A (NeuA), or Neuraminidase S (NeuS) and separated by SDS-PAGE. The gel was stained with Coomassie Brilliant Blue solution (a). Western blot was performed on the second human lung homogenate using lectins ConA (b), SNA (c), MAL-I (d), AAL (e), UEA-I (f), DBA (g) as well as antibodies against LeA (h), SLeA (i) and LeX (j). HRP-conjugated goat anti-mouse IgM (k), goat anti-mouse IgG (l), Streptavidin (m) and  $\beta$ -actin antibody (n) were used as quality control.



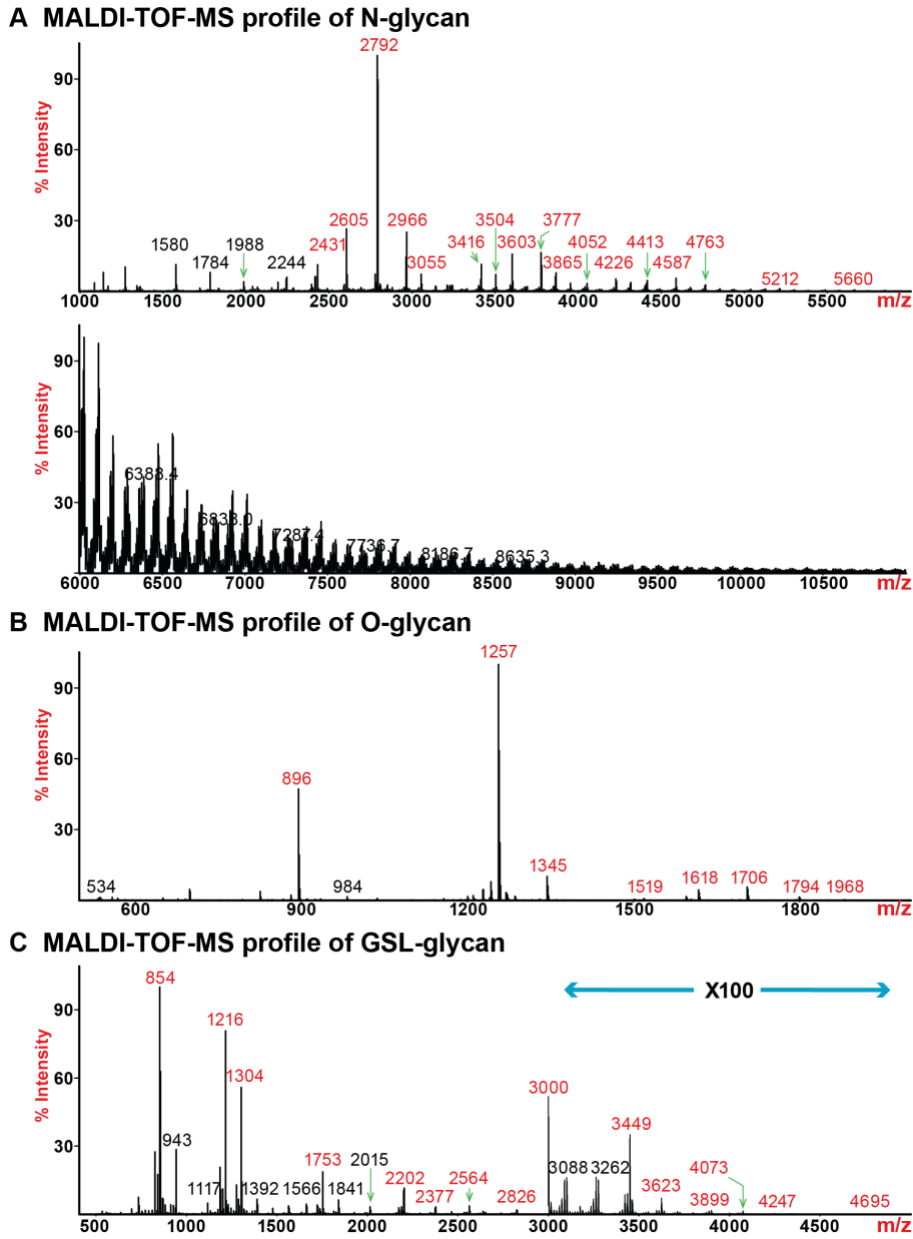

**Supplementary Fig. 8 Comparison of glycosylation patterns between two human lungs.** (a) MALDI-TOF-MS spectrum of untreated human lung-2 N-glycans. (b) MALDI-TOF-MS spectrum of human lung-2 O-glycans (c) MALDI-TOF-MS spectrum of human lung-2 GSL-glycans. Peak values representing sialylated glycans are colored in red and non-sialylated glycans are in black.

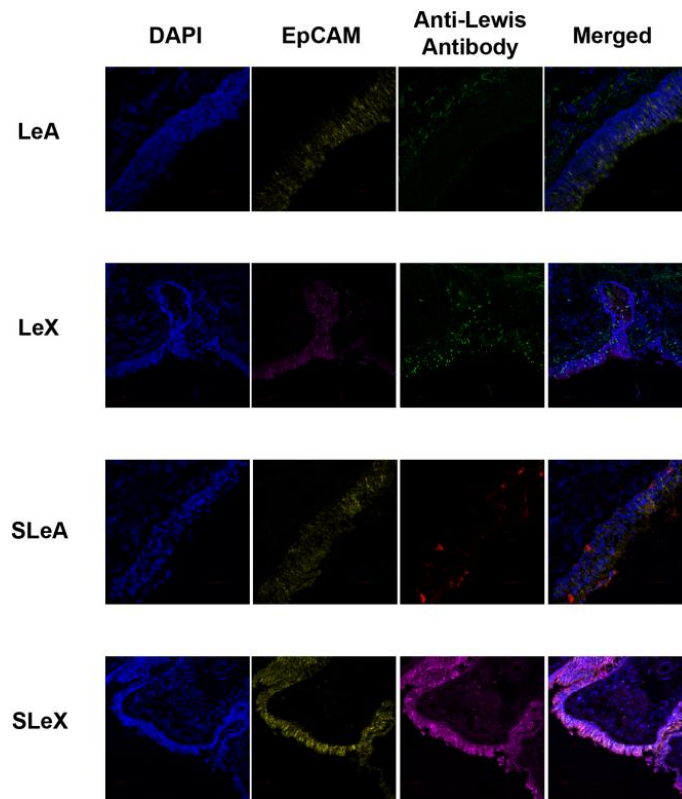

**Supplementary Fig. 9 Immunofluorescence staining of human lung sections.** The localization of Lewis antigens were visualized by immunofluorescence staining of human lung sections. Tissue sections were counterstained with a nucleus marker DAPI and an epithelium marker EpCAM.

**Supplementary Table 1** List of assigned peaks of human lung N-glycans from MALDI-TOF-MS analysis

**PNase F released N-glycan (1000-7000)**

| Composition                                                              | Observed monoisotopic Mass (m/z) | Relative abundance (%) |
|--------------------------------------------------------------------------|----------------------------------|------------------------|
| Fuc <sub>1</sub> Hex <sub>2</sub> HexNAC <sub>2</sub>                    | 1141.4                           | 3.51                   |
| Hex <sub>3</sub> HexNAC <sub>2</sub>                                     | 1171.6                           | 0.68                   |
| Fuc <sub>1</sub> Hex <sub>3</sub> HexNAC <sub>2</sub>                    | 1345.6                           | 0.98                   |
| Hex <sub>5</sub> HexNAC <sub>2</sub>                                     | 1579.8                           | 8.08                   |
| Fuc <sub>1</sub> Hex <sub>3</sub> HexNAC <sub>3</sub>                    | 1590.8                           | 0.24                   |
| Hex <sub>4</sub> HexNAC <sub>3</sub>                                     | 1620.8                           | 0.05                   |
| Hex <sub>6</sub> HexNAC <sub>2</sub>                                     | 1783.9                           | 6.21                   |
| Fuc <sub>1</sub> Hex <sub>4</sub> HexNAC <sub>3</sub>                    | 1794.9                           | 0.17                   |
| Fuc <sub>1</sub> Hex <sub>3</sub> HexNAC <sub>4</sub>                    | 1836.0                           | 1.68                   |
| Hex <sub>4</sub> HexNAC <sub>4</sub>                                     | 1866.0                           | 0.16                   |
| Hex <sub>3</sub> HexNAC <sub>5</sub>                                     | 1907.0                           | 0.10                   |
| Fuc <sub>2</sub> Hex <sub>4</sub> HexNAC <sub>3</sub>                    | 1968.0                           | 0.19                   |
| NeuAc <sub>1</sub> Hex <sub>4</sub> HexNAC <sub>3</sub>                  | 1982.0                           | 0.28                   |
| Hex <sub>7</sub> HexNAC <sub>2</sub>                                     | 1988.0                           | 3.11                   |
| Fuc <sub>1</sub> Hex <sub>4</sub> HexNAC <sub>4</sub>                    | 2040.1                           | 4.77                   |
| Hex <sub>5</sub> HexNAC <sub>4</sub>                                     | 2070.0                           | 1.61                   |
| Fuc <sub>1</sub> Hex <sub>3</sub> HexNAC <sub>5</sub>                    | 2081.1                           | 0.36                   |
| Hex <sub>4</sub> HexNAC <sub>5</sub>                                     | 2111.1                           | 0.21                   |
| NeuAc <sub>1</sub> Fuc <sub>1</sub> Hex <sub>4</sub> HexNAC <sub>3</sub> | 2156.1                           | 0.55                   |
| NeuAc <sub>1</sub> Hex <sub>5</sub> HexNAC <sub>3</sub>                  | 2186.1                           | 0.19                   |
| Hex <sub>8</sub> HexNAC <sub>2</sub>                                     | 2192.1                           | 2.60                   |
| Fuc <sub>2</sub> Hex <sub>4</sub> HexNAC <sub>4</sub>                    | 2213.1                           | 0.25                   |
| NeuAc <sub>1</sub> Hex <sub>4</sub> HexNAC <sub>4</sub>                  | 2227.1                           | 0.20                   |
| Fuc <sub>1</sub> Hex <sub>5</sub> HexNAC <sub>4</sub>                    | 2244.1                           | 6.80                   |
| Hex <sub>6</sub> HexNAC <sub>4</sub>                                     | 2274.1                           | 0.22                   |
| Fuc <sub>1</sub> Hex <sub>4</sub> HexNAC <sub>5</sub>                    | 2285.1                           | 0.85                   |
| Hex <sub>5</sub> HexNAC <sub>5</sub>                                     | 2315.2                           | 0.29                   |
| NeuAc <sub>1</sub> Hex <sub>6</sub> HexNAC <sub>3</sub>                  | 2390.2                           | 0.55                   |
| Hex <sub>9</sub> HexNAC <sub>2</sub>                                     | 2396.2                           | 2.29                   |
| NeuAc <sub>1</sub> Fuc <sub>1</sub> Hex <sub>4</sub> HexNAC <sub>4</sub> | 2401.2                           | 0.93                   |
| Fuc <sub>2</sub> Hex <sub>5</sub> HexNAC <sub>4</sub>                    | 2417.3                           | 8.87                   |
| NeuAc <sub>1</sub> Hex <sub>5</sub> HexNAC <sub>4</sub>                  | 2431.2                           | 13.66                  |
| Fuc <sub>1</sub> Hex <sub>5</sub> HexNAC <sub>5</sub>                    | 2489.3                           | 1.11                   |
| Hex <sub>6</sub> HexNAC <sub>5</sub>                                     | 2519.3                           | 0.18                   |
| Fuc <sub>3</sub> Hex <sub>5</sub> HexNAC <sub>4</sub>                    | 2591.3                           | 1.05                   |
| NeuAc <sub>1</sub> Fuc <sub>1</sub> Hex <sub>5</sub> HexNAC <sub>4</sub> | 2605.3                           | 18.00                  |
| NeuAc <sub>1</sub> Hex <sub>6</sub> HexNAC <sub>4</sub>                  | 2635.3                           | 0.39                   |
| NeuAc <sub>1</sub> Fuc <sub>1</sub> Hex <sub>4</sub> HexNAC <sub>5</sub> | 2646.3                           | 0.39                   |
| Fuc <sub>2</sub> Hex <sub>5</sub> HexNAC <sub>5</sub>                    | 2663.3                           | 0.30                   |
| NeuAc <sub>1</sub> Hex <sub>5</sub> HexNAC <sub>5</sub>                  | 2676.3                           | 0.21                   |

|                                                                          |        |        |
|--------------------------------------------------------------------------|--------|--------|
| Fuc <sub>1</sub> Hex <sub>6</sub> HexNAc <sub>5</sub>                    | 2693.4 | 0.93   |
| Fuc <sub>1</sub> Hex <sub>5</sub> HexNAc <sub>6</sub>                    | 2734.4 | 0.22   |
| NeuAc <sub>1</sub> Fuc <sub>2</sub> Hex <sub>5</sub> HexNAc <sub>4</sub> | 2779.4 | 7.81   |
| NeuAc <sub>2</sub> Hex <sub>5</sub> HexNAc <sub>4</sub>                  | 2792.4 | 100.00 |
| Fuc <sub>3</sub> Hex <sub>5</sub> HexNAc <sub>5</sub>                    | 2837.4 | 0.19   |
| NeuAc <sub>1</sub> Fuc <sub>1</sub> Hex <sub>5</sub> HexNAc <sub>5</sub> | 2850.4 | 1.41   |
| Fuc <sub>2</sub> Hex <sub>6</sub> HexNAc <sub>5</sub>                    | 2867.5 | 0.14   |
| NeuAc <sub>1</sub> Hex <sub>6</sub> HexNAc <sub>5</sub>                  | 2880.4 | 1.05   |
| Fuc <sub>1</sub> Hex <sub>6</sub> HexNAc <sub>6</sub>                    | 2938.4 | 0.27   |
| NeuAc <sub>1</sub> Fuc <sub>3</sub> Hex <sub>5</sub> HexNAc <sub>4</sub> | 2953.5 | 0.21   |
| NeuAc <sub>2</sub> Fuc <sub>1</sub> Hex <sub>5</sub> HexNAc <sub>4</sub> | 2966.5 | 11.10  |
| NeuAc <sub>1</sub> Fuc <sub>2</sub> Hex <sub>5</sub> HexNAc <sub>5</sub> | 3024.5 | 0.07   |
| NeuAc <sub>2</sub> Hex <sub>5</sub> HexNAc <sub>5</sub>                  | 3037.5 | 0.16   |
| Fuc <sub>3</sub> Hex <sub>6</sub> HexNAc <sub>5</sub>                    | 3041.6 | 0.43   |
| NeuAc <sub>1</sub> Fuc <sub>1</sub> Hex <sub>6</sub> HexNAc <sub>5</sub> | 3054.5 | 3.12   |
| Fuc <sub>2</sub> Hex <sub>6</sub> HexNAc <sub>6</sub>                    | 3112.6 | 0.07   |
| NeuAc <sub>1</sub> Hex <sub>6</sub> HexNAc <sub>6</sub>                  | 3125.6 | 0.05   |
| NeuAc <sub>2</sub> Fuc <sub>2</sub> Hex <sub>5</sub> HexNAc <sub>4</sub> | 3140.6 | 0.11   |
| Fuc <sub>1</sub> Hex <sub>7</sub> HexNAc <sub>6</sub>                    | 3142.6 | 0.94   |
| Fuc <sub>1</sub> Hex <sub>6</sub> HexNAc <sub>7</sub>                    | 3183.6 | 0.04   |
| NeuAc <sub>1</sub> Fuc <sub>3</sub> Hex <sub>5</sub> HexNAc <sub>5</sub> | 3198.6 | 0.09   |
| NeuAc <sub>2</sub> Fuc <sub>1</sub> Hex <sub>5</sub> HexNAc <sub>5</sub> | 3211.6 | 0.98   |
| Hex <sub>7</sub> HexNAc <sub>7</sub>                                     | 3213.6 | 1.36   |
| NeuAc <sub>1</sub> Fuc <sub>2</sub> Hex <sub>6</sub> HexNAc <sub>5</sub> | 3227.6 | 0.99   |
| NeuAc <sub>2</sub> Hex <sub>6</sub> HexNAc <sub>5</sub>                  | 3241.6 | 2.11   |
| Fuc <sub>3</sub> Hex <sub>6</sub> HexNAc <sub>6</sub>                    | 3286.7 | 0.06   |
| NeuAc <sub>1</sub> Fuc <sub>1</sub> Hex <sub>6</sub> HexNAc <sub>6</sub> | 3299.7 | 0.18   |
| NeuAc <sub>1</sub> Hex <sub>7</sub> HexNAc <sub>7</sub>                  | 3314.7 | 0.01   |
| Fuc <sub>2</sub> Hex <sub>7</sub> HexNAc <sub>6</sub>                    | 3316.6 | 0.14   |
| NeuAc <sub>3</sub> Fuc <sub>2</sub> Hex <sub>5</sub> HexNAc <sub>4</sub> | 3327.7 | 0.06   |
| NeuAc <sub>1</sub> Fuc <sub>1</sub> Hex <sub>7</sub> HexNAc <sub>6</sub> | 3329.7 | 0.26   |
| NeuAc <sub>2</sub> Fuc <sub>2</sub> Hex <sub>5</sub> HexNAc <sub>5</sub> | 3385.7 | 0.02   |
| Fuc <sub>1</sub> Hex <sub>7</sub> HexNAc <sub>7</sub>                    | 3387.7 | 0.35   |
| NeuAc <sub>1</sub> Fuc <sub>3</sub> Hex <sub>6</sub> HexNAc <sub>5</sub> | 3402.7 | 0.71   |
| NeuAc <sub>2</sub> Fuc <sub>1</sub> Hex <sub>6</sub> HexNAc <sub>5</sub> | 3415.8 | 2.86   |
| NeuAc <sub>1</sub> Fuc <sub>2</sub> Hex <sub>6</sub> HexNAc <sub>6</sub> | 3473.7 | 0.10   |
| NeuAc <sub>2</sub> Hex <sub>6</sub> HexNAc <sub>6</sub>                  | 3486.8 | 0.04   |
| NeuAc <sub>2</sub> Fuc <sub>4</sub> Hex <sub>5</sub> HexNAc <sub>4</sub> | 3488.8 | 0.06   |
| Fuc <sub>3</sub> Hex <sub>7</sub> HexNAc <sub>6</sub>                    | 3490.8 | 0.18   |
| NeuAc <sub>1</sub> Fuc <sub>1</sub> Hex <sub>7</sub> HexNAc <sub>6</sub> | 3503.8 | 1.33   |
| NeuAc <sub>2</sub> Fuc <sub>2</sub> Hex <sub>5</sub> HexNAc <sub>5</sub> | 3559.8 | 0.02   |
| Fuc <sub>2</sub> Hex <sub>7</sub> HexNAc <sub>7</sub>                    | 3561.8 | 0.07   |
| NeuAc <sub>1</sub> Hex <sub>7</sub> HexNAc <sub>7</sub>                  | 3574.8 | 0.10   |
| NeuAc <sub>2</sub> Fuc <sub>2</sub> Hex <sub>6</sub> HexNAc <sub>5</sub> | 3589.8 | 0.60   |
| Fuc <sub>1</sub> Hex <sub>8</sub> HexNAc <sub>7</sub>                    | 3591.8 | 0.88   |

|                                                                          |        |       |
|--------------------------------------------------------------------------|--------|-------|
| NeuAc <sub>3</sub> Hex <sub>6</sub> HexNAC <sub>5</sub>                  | 3602.8 | 16.31 |
| Fuc <sub>1</sub> Hex <sub>7</sub> HexNAC <sub>8</sub>                    | 3632.8 | 0.08  |
| NeuAc <sub>1</sub> Fuc <sub>3</sub> Hex <sub>6</sub> HexNAC <sub>6</sub> | 3647.8 | 0.04  |
| NeuAc <sub>2</sub> Fuc <sub>1</sub> Hex <sub>6</sub> HexNAC <sub>6</sub> | 3660.8 | 0.11  |
| Hex <sub>8</sub> HexNAC <sub>8</sub>                                     | 3662.8 | 0.42  |
| NeuAc <sub>1</sub> Fuc <sub>2</sub> Hex <sub>7</sub> HexNAC <sub>6</sub> | 3677.8 | 0.77  |
| NeuAc <sub>2</sub> Hex <sub>7</sub> HexNAC <sub>6</sub>                  | 3690.9 | 0.63  |
| Fuc <sub>3</sub> Hex <sub>7</sub> HexNAC <sub>7</sub>                    | 3735.9 | 0.03  |
| NeuAc <sub>1</sub> Fuc <sub>1</sub> Hex <sub>7</sub> HexNAC <sub>7</sub> | 3748.9 | 0.09  |
| NeuAc <sub>2</sub> Fuc <sub>3</sub> Hex <sub>6</sub> HexNAC <sub>5</sub> | 3763.9 | 0.07  |
| NeuAc <sub>3</sub> Fuc <sub>1</sub> Hex <sub>6</sub> HexNAC <sub>5</sub> | 3776.9 | 2.19  |
| Fuc <sub>2</sub> Hex <sub>7</sub> HexNAC <sub>8</sub>                    | 3806.9 | 0.04  |
| NeuAc <sub>2</sub> Fuc <sub>2</sub> Hex <sub>6</sub> HexNAC <sub>6</sub> | 3834.9 | 0.03  |
| Fuc <sub>1</sub> Hex <sub>8</sub> HexNAC <sub>8</sub>                    | 3836.9 | 0.19  |
| NeuAc <sub>3</sub> Hex <sub>6</sub> HexNAC <sub>6</sub>                  | 3847.9 | 0.02  |
| NeuAc <sub>1</sub> Fuc <sub>3</sub> Hex <sub>7</sub> HexNAC <sub>6</sub> | 3851.9 | 0.47  |
| NeuAc <sub>2</sub> Fuc <sub>1</sub> Hex <sub>7</sub> HexNAC <sub>6</sub> | 3864.9 | 0.81  |
| Fuc <sub>4</sub> Hex <sub>7</sub> HexNAC <sub>7</sub>                    | 3910.0 | 0.04  |
| NeuAc <sub>2</sub> Hex <sub>7</sub> HexNAC <sub>7</sub>                  | 3936.0 | 0.01  |
| NeuAc <sub>2</sub> Fuc <sub>4</sub> Hex <sub>6</sub> HexNAC <sub>5</sub> | 3938.0 | 0.03  |
| Fuc <sub>3</sub> Hex <sub>8</sub> HexNAC <sub>7</sub>                    | 3940.0 | 0.08  |
| NeuAc <sub>3</sub> Fuc <sub>2</sub> Hex <sub>6</sub> HexNAC <sub>5</sub> | 3951.0 | 0.04  |
| NeuAc <sub>1</sub> Fuc <sub>1</sub> Hex <sub>8</sub> HexNAC <sub>7</sub> | 3953.0 | 0.46  |
| NeuAc <sub>2</sub> Fuc <sub>3</sub> Hex <sub>6</sub> HexNAC <sub>6</sub> | 4009.0 | 0.01  |
| Fuc <sub>2</sub> Hex <sub>8</sub> HexNAC <sub>8</sub>                    | 4011.0 | 0.03  |
| NeuAc <sub>3</sub> Fuc <sub>1</sub> Hex <sub>6</sub> HexNAC <sub>6</sub> | 4022.0 | 0.01  |
| NeuAc <sub>1</sub> Hex <sub>8</sub> HexNAC <sub>8</sub>                  | 4024.0 | 0.07  |
| NeuAc <sub>1</sub> Fuc <sub>4</sub> Hex <sub>7</sub> HexNAC <sub>6</sub> | 4026.0 | 0.12  |
| NeuAc <sub>2</sub> Fuc <sub>2</sub> Hex <sub>7</sub> HexNAC <sub>6</sub> | 4039.0 | 0.51  |
| NeuAc <sub>3</sub> Hex <sub>7</sub> HexNAC <sub>6</sub>                  | 4052.0 | 1.65  |
| NeuAc <sub>3</sub> Fuc <sub>3</sub> Hex <sub>6</sub> HexNAC <sub>5</sub> | 4125.0 | 0.02  |
| NeuAc <sub>1</sub> Fuc <sub>2</sub> Hex <sub>8</sub> HexNAC <sub>7</sub> | 4127.0 | 0.20  |
| NeuAc <sub>4</sub> Fuc <sub>1</sub> Hex <sub>6</sub> HexNAC <sub>5</sub> | 4138.1 | 0.04  |
| NeuAc <sub>2</sub> Hex <sub>8</sub> HexNAC <sub>7</sub>                  | 4140.1 | 0.16  |
| NeuAc <sub>2</sub> Fuc <sub>4</sub> Hex <sub>6</sub> HexNAC <sub>6</sub> | 4183.1 | 0.01  |
| Fuc <sub>3</sub> Hex <sub>8</sub> HexNAC <sub>8</sub>                    | 4185.1 | 0.03  |
| NeuAc <sub>1</sub> Fuc <sub>1</sub> Hex <sub>8</sub> HexNAC <sub>8</sub> | 4198.1 | 0.06  |
| NeuAc <sub>2</sub> Fuc <sub>3</sub> Hex <sub>7</sub> HexNAC <sub>6</sub> | 4213.1 | 0.15  |
| NeuAc <sub>3</sub> Fuc <sub>1</sub> Hex <sub>7</sub> HexNAC <sub>6</sub> | 4226.1 | 0.33  |
| NeuAc <sub>2</sub> Fuc <sub>2</sub> Hex <sub>7</sub> HexNAC <sub>7</sub> | 4284.1 | 0.02  |
| Fuc <sub>1</sub> Hex <sub>9</sub> HexNAC <sub>9</sub>                    | 4286.1 | 0.05  |
| NeuAc <sub>3</sub> Hex <sub>7</sub> HexNAC <sub>7</sub>                  | 4297.2 | 0.01  |
| NeuAc <sub>3</sub> Fuc <sub>4</sub> Hex <sub>6</sub> HexNAC <sub>5</sub> | 4299.2 | 0.02  |
| NeuAc <sub>1</sub> Fuc <sub>3</sub> Hex <sub>8</sub> HexNAC <sub>7</sub> | 4301.2 | 0.21  |
| NeuAc <sub>2</sub> Fuc <sub>1</sub> Hex <sub>8</sub> HexNAC <sub>7</sub> | 4314.2 | 0.25  |

|                                                                           |        |       |
|---------------------------------------------------------------------------|--------|-------|
| NeuAc <sub>2</sub> Hex <sub>8</sub> HexNAc <sub>8</sub>                   | 4385.2 | 0.02  |
| NeuAc <sub>2</sub> Fuc <sub>4</sub> Hex <sub>7</sub> HexNAc <sub>6</sub>  | 4387.2 | 0.04  |
| Fuc <sub>3</sub> Hex <sub>9</sub> HexNAc <sub>8</sub>                     | 4389.2 | 0.06  |
| NeuAc <sub>3</sub> Fuc <sub>2</sub> Hex <sub>7</sub> HexNAc <sub>6</sub>  | 4400.2 | 0.11  |
| NeuAc <sub>1</sub> Fuc <sub>1</sub> Hex <sub>9</sub> HexNAc <sub>8</sub>  | 4402.2 | 0.65  |
| NeuAc <sub>4</sub> Hex <sub>7</sub> HexNAc <sub>6</sub>                   | 4413.2 | 2.55  |
| NeuAc <sub>3</sub> Fuc <sub>1</sub> Hex <sub>7</sub> HexNAc <sub>7</sub>  | 4471.2 | 0.01  |
| NeuAc <sub>1</sub> Hex <sub>9</sub> HexNAc <sub>9</sub>                   | 4473.2 | 0.04  |
| NeuAc <sub>1</sub> Fuc <sub>4</sub> Hex <sub>8</sub> HexNAc <sub>7</sub>  | 4475.2 | 0.11  |
| NeuAc <sub>2</sub> Fuc <sub>2</sub> Hex <sub>8</sub> HexNAc <sub>7</sub>  | 4488.2 | 0.11  |
| NeuAc <sub>3</sub> Hex <sub>8</sub> HexNAc <sub>7</sub>                   | 4501.2 | 0.07  |
| NeuAc <sub>3</sub> Fuc <sub>3</sub> Hex <sub>7</sub> HexNAc <sub>6</sub>  | 4574.2 | 0.03  |
| NeuAc <sub>1</sub> Fuc <sub>2</sub> Hex <sub>9</sub> HexNAc <sub>8</sub>  | 4576.3 | 0.10  |
| NeuAc <sub>4</sub> Fuc <sub>1</sub> Hex <sub>7</sub> HexNAc <sub>6</sub>  | 4587.3 | 0.26  |
| NeuAc <sub>2</sub> Fuc <sub>4</sub> Hex <sub>7</sub> HexNAc <sub>7</sub>  | 4632.3 | <0.01 |
| Fuc <sub>3</sub> Hex <sub>9</sub> HexNAc <sub>9</sub>                     | 4634.3 | 0.01  |
| NeuAc <sub>3</sub> Fuc <sub>2</sub> Hex <sub>7</sub> HexNAc <sub>7</sub>  | 4645.3 | <0.01 |
| NeuAc <sub>1</sub> Fuc <sub>1</sub> Hex <sub>9</sub> HexNAc <sub>9</sub>  | 4647.3 | 0.02  |
| NeuAc <sub>1</sub> Fuc <sub>5</sub> Hex <sub>8</sub> HexNAc <sub>7</sub>  | 4649.3 | 0.07  |
| NeuAc <sub>2</sub> Fuc <sub>3</sub> Hex <sub>8</sub> HexNAc <sub>7</sub>  | 4662.3 | 0.07  |
| NeuAc <sub>3</sub> Fuc <sub>1</sub> Hex <sub>8</sub> HexNAc <sub>7</sub>  | 4675.4 | 0.09  |
| NeuAc <sub>1</sub> Fuc <sub>4</sub> Hex <sub>8</sub> HexNAc <sub>8</sub>  | 4720.4 | 0.01  |
| NeuAc <sub>2</sub> Fuc <sub>2</sub> Hex <sub>8</sub> HexNAc <sub>8</sub>  | 4733.4 | 0.01  |
| Fuc <sub>1</sub> Hex <sub>10</sub> HexNAc <sub>10</sub>                   | 4735.4 | 0.03  |
| NeuAc <sub>3</sub> Hex <sub>8</sub> HexNAc <sub>8</sub>                   | 4746.4 | <0.01 |
| NeuAc <sub>3</sub> Fuc <sub>4</sub> Hex <sub>7</sub> HexNAc <sub>6</sub>  | 4748.4 | 0.01  |
| NeuAc <sub>1</sub> Fuc <sub>3</sub> Hex <sub>9</sub> HexNAc <sub>8</sub>  | 4750.4 | 0.11  |
| NeuAc <sub>4</sub> Fuc <sub>2</sub> Hex <sub>7</sub> HexNAc <sub>6</sub>  | 4761.4 | 0.01  |
| NeuAc <sub>2</sub> Fuc <sub>1</sub> Hex <sub>9</sub> HexNAc <sub>8</sub>  | 4763.5 | 0.15  |
| NeuAc <sub>2</sub> Fuc <sub>5</sub> Hex <sub>7</sub> HexNAc <sub>7</sub>  | 4806.4 | 0.01  |
| Fuc <sub>4</sub> Hex <sub>9</sub> HexNAc <sub>9</sub>                     | 4808.4 | 0.01  |
| NeuAc <sub>3</sub> Fuc <sub>3</sub> Hex <sub>7</sub> HexNAc <sub>7</sub>  | 4819.4 | <0.01 |
| NeuAc <sub>1</sub> Fuc <sub>2</sub> Hex <sub>9</sub> HexNAc <sub>9</sub>  | 4821.4 | 0.01  |
| NeuAc <sub>1</sub> Fuc <sub>6</sub> Hex <sub>8</sub> HexNAc <sub>7</sub>  | 4823.4 | 0.01  |
| NeuAc <sub>2</sub> Hex <sub>9</sub> HexNAc <sub>9</sub>                   | 4834.4 | <0.01 |
| NeuAc <sub>2</sub> Fuc <sub>4</sub> Hex <sub>8</sub> HexNAc <sub>7</sub>  | 4836.4 | 0.02  |
| NeuAc <sub>3</sub> Fuc <sub>2</sub> Hex <sub>8</sub> HexNAc <sub>7</sub>  | 4849.4 | 0.03  |
| NeuAc <sub>1</sub> Fuc <sub>1</sub> Hex <sub>10</sub> HexNAc <sub>9</sub> | 4851.4 | 0.10  |
| NeuAc <sub>4</sub> Hex <sub>8</sub> HexNAc <sub>7</sub>                   | 4862.4 | 0.06  |
| NeuAc <sub>1</sub> Fuc <sub>5</sub> Hex <sub>8</sub> HexNAc <sub>8</sub>  | 4894.5 | <0.01 |
| NeuAc <sub>2</sub> Fuc <sub>3</sub> Hex <sub>8</sub> HexNAc <sub>8</sub>  | 4907.5 | <0.01 |
| Fuc <sub>2</sub> Hex <sub>10</sub> HexNAc <sub>10</sub>                   | 4909.5 | 0.01  |
| NeuAc <sub>3</sub> Fuc <sub>1</sub> Hex <sub>8</sub> HexNAc <sub>8</sub>  | 4920.5 | 0.01  |
| NeuAc <sub>1</sub> Hex <sub>10</sub> HexNAc <sub>10</sub>                 | 4922.5 | 0.02  |
| NeuAc <sub>1</sub> Fuc <sub>4</sub> Hex <sub>9</sub> HexNAc <sub>8</sub>  | 4924.5 | 0.09  |

|                                                                            |        |       |
|----------------------------------------------------------------------------|--------|-------|
| NeuAc <sub>2</sub> Fuc <sub>2</sub> Hex <sub>9</sub> HexNAc <sub>8</sub>   | 4937.5 | 0.06  |
| NeuAc <sub>5</sub> Fuc <sub>1</sub> Hex <sub>7</sub> HexNAc <sub>6</sub>   | 4948.5 | 0.01  |
| NeuAc <sub>3</sub> Hex <sub>9</sub> HexNAc <sub>8</sub>                    | 4950.5 | 0.06  |
| NeuAc <sub>2</sub> Fuc <sub>6</sub> Hex <sub>7</sub> HexNAc <sub>7</sub>   | 4980.5 | <0.01 |
| NeuAc <sub>3</sub> Fuc <sub>4</sub> Hex <sub>7</sub> HexNAc <sub>7</sub>   | 4993.5 | <0.01 |
| NeuAc <sub>1</sub> Fuc <sub>3</sub> Hex <sub>9</sub> HexNAc <sub>9</sub>   | 4995.5 | 0.01  |
| NeuAc <sub>2</sub> Fuc <sub>1</sub> Hex <sub>9</sub> HexNAc <sub>9</sub>   | 5008.6 | <0.01 |
| NeuAc <sub>2</sub> Fuc <sub>5</sub> Hex <sub>8</sub> HexNAc <sub>7</sub>   | 5010.6 | 0.03  |
| NeuAc <sub>3</sub> Fuc <sub>3</sub> Hex <sub>8</sub> HexNAc <sub>7</sub>   | 5023.6 | 0.01  |
| NeuAc <sub>1</sub> Fuc <sub>2</sub> Hex <sub>10</sub> HexNAc <sub>9</sub>  | 5025.6 | 0.04  |
| NeuAc <sub>4</sub> Fuc <sub>1</sub> Hex <sub>8</sub> HexNAc <sub>7</sub>   | 5036.6 | 0.03  |
| NeuAc <sub>1</sub> Fuc <sub>6</sub> Hex <sub>8</sub> HexNAc <sub>8</sub>   | 5068.6 | <0.01 |
| NeuAc <sub>2</sub> Fuc <sub>4</sub> Hex <sub>8</sub> HexNAc <sub>8</sub>   | 5081.6 | <0.01 |
| Fuc <sub>3</sub> Hex <sub>10</sub> HexNAc <sub>10</sub>                    | 5083.6 | 0.01  |
| NeuAc <sub>3</sub> Fuc <sub>2</sub> Hex <sub>8</sub> HexNAc <sub>8</sub>   | 5094.6 | <0.01 |
| NeuAc <sub>1</sub> Fuc <sub>1</sub> Hex <sub>10</sub> HexNAc <sub>10</sub> | 5096.6 | 0.01  |
| NeuAc <sub>1</sub> Fuc <sub>5</sub> Hex <sub>9</sub> HexNAc <sub>8</sub>   | 5098.6 | 0.04  |
| NeuAc <sub>2</sub> Fuc <sub>3</sub> Hex <sub>9</sub> HexNAc <sub>8</sub>   | 5111.6 | 0.03  |
| NeuAc <sub>3</sub> Fuc <sub>1</sub> Hex <sub>9</sub> HexNAc <sub>8</sub>   | 5124.6 | 0.03  |
| NeuAc <sub>1</sub> Fuc <sub>4</sub> Hex <sub>9</sub> HexNAc <sub>9</sub>   | 5169.7 | <0.01 |
| NeuAc <sub>2</sub> Fuc <sub>2</sub> Hex <sub>9</sub> HexNAc <sub>9</sub>   | 5182.7 | <0.01 |
| NeuAc <sub>2</sub> Fuc <sub>6</sub> Hex <sub>8</sub> HexNAc <sub>7</sub>   | 5184.7 | 0.01  |
| NeuAc <sub>3</sub> Hex <sub>9</sub> HexNAc <sub>9</sub>                    | 5195.7 | <0.01 |
| NeuAc <sub>3</sub> Fuc <sub>4</sub> Hex <sub>8</sub> HexNAc <sub>7</sub>   | 5197.7 | 0.01  |
| NeuAc <sub>1</sub> Fuc <sub>3</sub> Hex <sub>10</sub> HexNAc <sub>9</sub>  | 5199.7 | 0.03  |
| NeuAc <sub>4</sub> Fuc <sub>2</sub> Hex <sub>8</sub> HexNAc <sub>7</sub>   | 5210.7 | <0.01 |
| NeuAc <sub>2</sub> Fuc <sub>1</sub> Hex <sub>10</sub> HexNAc <sub>9</sub>  | 5212.7 | 0.04  |
| NeuAc <sub>2</sub> Fuc <sub>5</sub> Hex <sub>8</sub> HexNAc <sub>8</sub>   | 5255.7 | <0.01 |
| NeuAc <sub>3</sub> Fuc <sub>3</sub> Hex <sub>8</sub> HexNAc <sub>8</sub>   | 5268.7 | <0.01 |
| NeuAc <sub>1</sub> Fuc <sub>2</sub> Hex <sub>10</sub> HexNAc <sub>10</sub> | 5270.7 | <0.01 |
| NeuAc <sub>1</sub> Fuc <sub>6</sub> Hex <sub>9</sub> HexNAc <sub>8</sub>   | 5272.7 | 0.01  |
| NeuAc <sub>2</sub> Hex <sub>10</sub> HexNAc <sub>10</sub>                  | 5283.8 | <0.01 |
| NeuAc <sub>2</sub> Fuc <sub>4</sub> Hex <sub>9</sub> HexNAc <sub>8</sub>   | 5285.8 | 0.02  |
| NeuAc <sub>3</sub> Fuc <sub>2</sub> Hex <sub>9</sub> HexNAc <sub>8</sub>   | 5298.8 | <0.01 |
| NeuAc <sub>1</sub> Fuc <sub>1</sub> Hex <sub>11</sub> HexNAc <sub>10</sub> | 5300.8 | 0.04  |
| NeuAc <sub>4</sub> Hex <sub>9</sub> HexNAc <sub>8</sub>                    | 5311.8 | 0.01  |
| NeuAc <sub>1</sub> Fuc <sub>5</sub> Hex <sub>9</sub> HexNAc <sub>9</sub>   | 5343.8 | <0.01 |
| NeuAc <sub>2</sub> Fuc <sub>3</sub> Hex <sub>9</sub> HexNAc <sub>9</sub>   | 5356.8 | <0.01 |
| Fuc <sub>2</sub> Hex <sub>11</sub> HexNAc <sub>11</sub>                    | 5358.8 | 0.01  |
| NeuAc <sub>3</sub> Fuc <sub>1</sub> Hex <sub>9</sub> HexNAc <sub>9</sub>   | 5369.8 | <0.01 |
| NeuAc <sub>1</sub> Hex <sub>11</sub> HexNAc <sub>11</sub>                  | 5371.8 | 0.01  |
| NeuAc <sub>1</sub> Fuc <sub>4</sub> Hex <sub>10</sub> HexNAc <sub>9</sub>  | 5373.8 | 0.02  |
| NeuAc <sub>4</sub> Fuc <sub>3</sub> Hex <sub>8</sub> HexNAc <sub>7</sub>   | 5384.8 | <0.01 |
| NeuAc <sub>2</sub> Fuc <sub>2</sub> Hex <sub>10</sub> HexNAc <sub>9</sub>  | 5386.8 | 0.01  |
| NeuAc <sub>5</sub> Fuc <sub>1</sub> Hex <sub>8</sub> HexNAc <sub>7</sub>   | 5397.8 | <0.01 |

|                                                                            |        |       |
|----------------------------------------------------------------------------|--------|-------|
| NeuAc <sub>3</sub> Hex <sub>10</sub> HexNAC <sub>9</sub>                   | 5399.8 | 0.01  |
| NeuAc <sub>2</sub> Fuc <sub>6</sub> Hex <sub>8</sub> HexNAC <sub>8</sub>   | 5429.8 | <0.01 |
| NeuAc <sub>3</sub> Fuc <sub>4</sub> Hex <sub>8</sub> HexNAC <sub>8</sub>   | 5442.8 | <0.01 |
| NeuAc <sub>1</sub> Fuc <sub>3</sub> Hex <sub>10</sub> HexNAC <sub>10</sub> | 5444.8 | <0.01 |
| NeuAc <sub>1</sub> Fuc <sub>7</sub> Hex <sub>9</sub> HexNAC <sub>8</sub>   | 5446.8 | <0.01 |
| NeuAc <sub>2</sub> Fuc <sub>1</sub> Hex <sub>10</sub> HexNAC <sub>10</sub> | 5457.8 | <0.01 |
| NeuAc <sub>2</sub> Fuc <sub>5</sub> Hex <sub>9</sub> HexNAC <sub>8</sub>   | 5459.8 | 0.02  |
| NeuAc <sub>3</sub> Fuc <sub>3</sub> Hex <sub>9</sub> HexNAC <sub>8</sub>   | 5472.8 | 0.01  |
| NeuAc <sub>1</sub> Fuc <sub>2</sub> Hex <sub>11</sub> HexNAC <sub>10</sub> | 5474.8 | 0.02  |
| NeuAc <sub>4</sub> Fuc <sub>1</sub> Hex <sub>9</sub> HexNAC <sub>8</sub>   | 5485.8 | 0.01  |
| NeuAc <sub>2</sub> Fuc <sub>4</sub> Hex <sub>9</sub> HexNAC <sub>9</sub>   | 5530.9 | <0.01 |
| Fuc <sub>3</sub> Hex <sub>11</sub> HexNAC <sub>11</sub>                    | 5532.9 | <0.01 |
| NeuAc <sub>1</sub> Fuc <sub>1</sub> Hex <sub>11</sub> HexNAC <sub>11</sub> | 5545.9 | 0.01  |
| NeuAc <sub>1</sub> Fuc <sub>5</sub> Hex <sub>10</sub> HexNAC <sub>9</sub>  | 5547.9 | 0.02  |
| NeuAc <sub>4</sub> Fuc <sub>4</sub> Hex <sub>8</sub> HexNAC <sub>7</sub>   | 5558.9 | <0.01 |
| NeuAc <sub>2</sub> Fuc <sub>3</sub> Hex <sub>10</sub> HexNAC <sub>9</sub>  | 5560.9 | 0.01  |
| NeuAc <sub>3</sub> Fuc <sub>1</sub> Hex <sub>10</sub> HexNAC <sub>9</sub>  | 5573.9 | 0.01  |
| NeuAc <sub>1</sub> Fuc <sub>4</sub> Hex <sub>10</sub> HexNAC <sub>10</sub> | 5618.9 | <0.01 |
| NeuAc <sub>2</sub> Fuc <sub>2</sub> Hex <sub>10</sub> HexNAC <sub>10</sub> | 5631.9 | <0.01 |
| NeuAc <sub>2</sub> Fuc <sub>6</sub> Hex <sub>9</sub> HexNAC <sub>8</sub>   | 5633.9 | <0.01 |
| NeuAc <sub>3</sub> Fuc <sub>4</sub> Hex <sub>9</sub> HexNAC <sub>8</sub>   | 5646.9 | <0.01 |
| NeuAc <sub>1</sub> Fuc <sub>3</sub> Hex <sub>11</sub> HexNAC <sub>10</sub> | 5648.9 | 0.01  |
| NeuAc <sub>4</sub> Fuc <sub>2</sub> Hex <sub>9</sub> HexNAC <sub>8</sub>   | 5659.9 | <0.01 |
| NeuAc <sub>2</sub> Fuc <sub>1</sub> Hex <sub>11</sub> HexNAC <sub>10</sub> | 5661.9 | 0.03  |
| NeuAc <sub>5</sub> Hex <sub>9</sub> HexNAC <sub>8</sub>                    | 5673.0 | 0.01  |
| NeuAc <sub>1</sub> Fuc <sub>2</sub> Hex <sub>11</sub> HexNAC <sub>11</sub> | 5720.0 | <0.01 |
| NeuAc <sub>1</sub> Fuc <sub>6</sub> Hex <sub>10</sub> HexNAC <sub>9</sub>  | 5722.0 | <0.01 |
| NeuAc <sub>2</sub> Hex <sub>11</sub> HexNAC <sub>11</sub>                  | 5733.0 | <0.01 |
| NeuAc <sub>2</sub> Fuc <sub>4</sub> Hex <sub>10</sub> HexNAC <sub>9</sub>  | 5735.0 | 0.01  |
| NeuAc <sub>3</sub> Fuc <sub>2</sub> Hex <sub>10</sub> HexNAC <sub>9</sub>  | 5748.0 | 0.01  |
| NeuAc <sub>1</sub> Fuc <sub>1</sub> Hex <sub>12</sub> HexNAC <sub>11</sub> | 5750.0 | 0.02  |
| NeuAc <sub>4</sub> Hex <sub>10</sub> HexNAC <sub>9</sub>                   | 5761.0 | <0.01 |
| NeuAc <sub>3</sub> Fuc <sub>1</sub> Hex <sub>10</sub> HexNAC <sub>10</sub> | 5819.0 | <0.01 |
| NeuAc <sub>1</sub> Hex <sub>12</sub> HexNAC <sub>12</sub>                  | 5821.0 | 0.01  |
| NeuAc <sub>1</sub> Fuc <sub>4</sub> Hex <sub>11</sub> HexNAC <sub>10</sub> | 5823.0 | 0.01  |
| NeuAc <sub>4</sub> Fuc <sub>3</sub> Hex <sub>9</sub> HexNAC <sub>8</sub>   | 5834.0 | <0.01 |
| NeuAc <sub>2</sub> Fuc <sub>2</sub> Hex <sub>11</sub> HexNAC <sub>10</sub> | 5836.0 | 0.01  |
| Fuc <sub>1</sub> Hex <sub>13</sub> HexNAC <sub>12</sub>                    | 5838.0 | 0.01  |
| NeuAc <sub>5</sub> Fuc <sub>1</sub> Hex <sub>9</sub> HexNAC <sub>8</sub>   | 5847.0 | 0.01  |
| NeuAc <sub>1</sub> Fuc <sub>3</sub> Hex <sub>11</sub> HexNAC <sub>11</sub> | 5894.0 | <0.01 |
| NeuAc <sub>2</sub> Fuc <sub>1</sub> Hex <sub>11</sub> HexNAC <sub>11</sub> | 5907.1 | <0.01 |
| NeuAc <sub>2</sub> Fuc <sub>5</sub> Hex <sub>10</sub> HexNAC <sub>9</sub>  | 5909.1 | 0.01  |
| NeuAc <sub>3</sub> Fuc <sub>3</sub> Hex <sub>10</sub> HexNAC <sub>9</sub>  | 5922.1 | <0.01 |
| NeuAc <sub>1</sub> Fuc <sub>2</sub> Hex <sub>12</sub> HexNAC <sub>11</sub> | 5924.1 | 0.01  |
| NeuAc <sub>4</sub> Fuc <sub>1</sub> Hex <sub>10</sub> HexNAC <sub>9</sub>  | 5935.1 | <0.01 |



|                                                                            |        |       |
|----------------------------------------------------------------------------|--------|-------|
| NeuAc <sub>1</sub> Fuc <sub>6</sub> Hex <sub>10</sub> HexNAc <sub>10</sub> | 5967.1 | <0.01 |
| NeuAc <sub>1</sub> Fuc <sub>1</sub> Hex <sub>12</sub> HexNAc <sub>12</sub> | 5995.2 | <0.01 |
| NeuAc <sub>1</sub> Fuc <sub>5</sub> Hex <sub>11</sub> HexNAc <sub>10</sub> | 5997.2 | 0.01  |
| NeuAc <sub>4</sub> Fuc <sub>4</sub> Hex <sub>9</sub> HexNAc <sub>8</sub>   | 6008.2 | <0.01 |
| NeuAc <sub>2</sub> Fuc <sub>3</sub> Hex <sub>11</sub> HexNAc <sub>10</sub> | 6010.2 | 0.01  |
| NeuAc <sub>5</sub> Fuc <sub>2</sub> Hex <sub>9</sub> HexNAc <sub>8</sub>   | 6021.2 | <0.01 |
| NeuAc <sub>3</sub> Fuc <sub>1</sub> Hex <sub>11</sub> HexNAc <sub>10</sub> | 6023.2 | 0.01  |
| NeuAc <sub>2</sub> Fuc <sub>6</sub> Hex <sub>10</sub> HexNAc <sub>9</sub>  | 6083.2 | <0.01 |
| NeuAc <sub>3</sub> Fuc <sub>4</sub> Hex <sub>10</sub> HexNAc <sub>9</sub>  | 6096.3 | <0.01 |
| NeuAc <sub>1</sub> Fuc <sub>3</sub> Hex <sub>12</sub> HexNAc <sub>11</sub> | 6098.3 | <0.01 |
| NeuAc <sub>4</sub> Fuc <sub>2</sub> Hex <sub>10</sub> HexNAc <sub>9</sub>  | 6109.3 | <0.01 |
| NeuAc <sub>2</sub> Fuc <sub>1</sub> Hex <sub>12</sub> HexNAc <sub>11</sub> | 6111.3 | 0.01  |
| NeuAc <sub>1</sub> Fuc <sub>2</sub> Hex <sub>12</sub> HexNAc <sub>12</sub> | 6169.3 | <0.01 |
| NeuAc <sub>1</sub> Fuc <sub>6</sub> Hex <sub>11</sub> HexNAc <sub>10</sub> | 6171.3 | <0.01 |
| NeuAc <sub>2</sub> Hex <sub>12</sub> HexNAc <sub>12</sub>                  | 6182.3 | <0.01 |
| NeuAc <sub>2</sub> Fuc <sub>4</sub> Hex <sub>11</sub> HexNAc <sub>10</sub> | 6184.3 | 0.01  |
| NeuAc <sub>3</sub> Fuc <sub>2</sub> Hex <sub>11</sub> HexNAc <sub>10</sub> | 6197.4 | <0.01 |
| NeuAc <sub>1</sub> Fuc <sub>1</sub> Hex <sub>13</sub> HexNAc <sub>12</sub> | 6199.4 | <0.01 |
| NeuAc <sub>1</sub> Hex <sub>13</sub> HexNAc <sub>13</sub>                  | 6270.5 | <0.01 |
| NeuAc <sub>1</sub> Fuc <sub>4</sub> Hex <sub>12</sub> HexNAc <sub>11</sub> | 6272.5 | <0.01 |
| NeuAc <sub>2</sub> Fuc <sub>2</sub> Hex <sub>12</sub> HexNAc <sub>11</sub> | 6285.5 | <0.01 |
| NeuAc <sub>2</sub> Fuc <sub>5</sub> Hex <sub>11</sub> HexNAc <sub>10</sub> | 6358.6 | <0.01 |
| NeuAc <sub>1</sub> Fuc <sub>2</sub> Hex <sub>13</sub> HexNAc <sub>12</sub> | 6373.6 | <0.01 |
| NeuAc <sub>4</sub> Fuc <sub>1</sub> Hex <sub>11</sub> HexNAc <sub>10</sub> | 6384.6 | <0.01 |
| NeuAc <sub>1</sub> Fuc <sub>5</sub> Hex <sub>12</sub> HexNAc <sub>11</sub> | 6446.7 | <0.01 |
| NeuAc <sub>2</sub> Fuc <sub>3</sub> Hex <sub>12</sub> HexNAc <sub>11</sub> | 6459.7 | <0.01 |
| NeuAc <sub>3</sub> Fuc <sub>1</sub> Hex <sub>12</sub> HexNAc <sub>11</sub> | 6472.7 | <0.01 |
| NeuAc <sub>1</sub> Fuc <sub>3</sub> Hex <sub>13</sub> HexNAc <sub>12</sub> | 6547.7 | <0.01 |
| NeuAc <sub>2</sub> Fuc <sub>1</sub> Hex <sub>13</sub> HexNAc <sub>12</sub> | 6560.7 | <0.01 |
| NeuAc <sub>3</sub> Fuc <sub>2</sub> Hex <sub>12</sub> HexNAc <sub>11</sub> | 6646.7 | <0.01 |
| NeuAc <sub>1</sub> Fuc <sub>1</sub> Hex <sub>14</sub> HexNAc <sub>13</sub> | 6648.7 | <0.01 |
| NeuAc <sub>1</sub> Hex <sub>14</sub> HexNAc <sub>14</sub>                  | 6719.8 | <0.01 |
| NeuAc <sub>1</sub> Fuc <sub>4</sub> Hex <sub>13</sub> HexNAc <sub>12</sub> | 6721.8 | <0.01 |
| NeuAc <sub>2</sub> Fuc <sub>2</sub> Hex <sub>13</sub> HexNAc <sub>12</sub> | 6734.8 | <0.01 |
| NeuAc <sub>1</sub> Fuc <sub>2</sub> Hex <sub>14</sub> HexNAc <sub>13</sub> | 6822.8 | <0.01 |
| NeuAc <sub>1</sub> Fuc <sub>5</sub> Hex <sub>13</sub> HexNAc <sub>12</sub> | 6895.8 | <0.01 |
| NeuAc <sub>3</sub> Fuc <sub>1</sub> Hex <sub>13</sub> HexNAc <sub>12</sub> | 6921.8 | <0.01 |

#### PNGase F released N-glycan (5000-12000)

| Composition                                                               | Observed average Mass (m/z) | Relative abundance (%) |
|---------------------------------------------------------------------------|-----------------------------|------------------------|
| NeuAc <sub>2</sub> Fuc <sub>5</sub> Hex <sub>8</sub> HexNAc <sub>7</sub>  | 5013.1                      | 29.87                  |
| NeuAc <sub>1</sub> Fuc <sub>2</sub> Hex <sub>10</sub> HexNAc <sub>9</sub> | 5027.7                      | 47.30                  |
| NeuAc <sub>4</sub> Fuc <sub>1</sub> Hex <sub>8</sub> HexNAc <sub>7</sub>  | 5040.1                      | 100.00                 |
| NeuAc <sub>1</sub> Fuc <sub>6</sub> Hex <sub>8</sub> HexNAc <sub>8</sub>  | 5071.1                      | 6.01                   |

|                                                                            |        |       |
|----------------------------------------------------------------------------|--------|-------|
| NeuAc <sub>2</sub> Fuc <sub>4</sub> Hex <sub>8</sub> HexNAC <sub>8</sub>   | 5086.2 | 12.18 |
| NeuAc <sub>1</sub> Fuc <sub>5</sub> Hex <sub>9</sub> HexNAC <sub>8</sub>   | 5100.9 | 59.63 |
| NeuAc <sub>2</sub> Fuc <sub>3</sub> Hex <sub>9</sub> HexNAC <sub>8</sub>   | 5114.8 | 82.64 |
| NeuAc <sub>3</sub> Fuc <sub>1</sub> Hex <sub>9</sub> HexNAC <sub>8</sub>   | 5128.1 | 94.46 |
| NeuAc <sub>1</sub> Fuc <sub>4</sub> Hex <sub>9</sub> HexNAC <sub>9</sub>   | 5173.6 | 12.77 |
| NeuAc <sub>2</sub> Fuc <sub>6</sub> Hex <sub>8</sub> HexNAC <sub>7</sub>   | 5188.3 | 20.63 |
| NeuAc <sub>1</sub> Fuc <sub>3</sub> Hex <sub>10</sub> HexNAC <sub>9</sub>  | 5202.4 | 46.90 |
| NeuAc <sub>2</sub> Fuc <sub>1</sub> Hex <sub>10</sub> HexNAC <sub>9</sub>  | 5215.8 | 89.16 |
| NeuAc <sub>2</sub> Fuc <sub>5</sub> Hex <sub>8</sub> HexNAC <sub>8</sub>   | 5260.1 | 6.66  |
| NeuAc <sub>1</sub> Fuc <sub>6</sub> Hex <sub>9</sub> HexNAC <sub>8</sub>   | 5275.2 | 14.87 |
| NeuAc <sub>2</sub> Fuc <sub>4</sub> Hex <sub>9</sub> HexNAC <sub>8</sub>   | 5289.1 | 44.11 |
| NeuAc <sub>1</sub> Fuc <sub>1</sub> Hex <sub>11</sub> HexNAC <sub>10</sub> | 5302.8 | 66.46 |
| NeuAc <sub>4</sub> Hex <sub>9</sub> HexNAC <sub>8</sub>                    | 5315.3 | 45.12 |
| NeuAc <sub>1</sub> Fuc <sub>5</sub> Hex <sub>9</sub> HexNAC <sub>9</sub>   | 5347.3 | 5.68  |
| NeuAc <sub>2</sub> Fuc <sub>3</sub> Hex <sub>9</sub> HexNAC <sub>9</sub>   | 5361.9 | 12.51 |
| NeuAc <sub>1</sub> Fuc <sub>4</sub> Hex <sub>10</sub> HexNAC <sub>9</sub>  | 5376.4 | 39.51 |
| NeuAc <sub>2</sub> Fuc <sub>2</sub> Hex <sub>10</sub> HexNAC <sub>9</sub>  | 5390.3 | 40.14 |
| NeuAc <sub>3</sub> Hex <sub>10</sub> HexNAC <sub>9</sub>                   | 5402.8 | 14.67 |
| NeuAc <sub>2</sub> Fuc <sub>6</sub> Hex <sub>8</sub> HexNAC <sub>8</sub>   | 5433.8 | 4.91  |
| NeuAc <sub>1</sub> Fuc <sub>3</sub> Hex <sub>10</sub> HexNAC <sub>10</sub> | 5448.2 | 7.66  |
| NeuAc <sub>2</sub> Fuc <sub>5</sub> Hex <sub>9</sub> HexNAC <sub>8</sub>   | 5462.6 | 24.25 |
| NeuAc <sub>1</sub> Fuc <sub>2</sub> Hex <sub>11</sub> HexNAC <sub>10</sub> | 5476.8 | 35.61 |
| NeuAc <sub>4</sub> Fuc <sub>1</sub> Hex <sub>9</sub> HexNAC <sub>8</sub>   | 5489.7 | 65.38 |
| NeuAc <sub>1</sub> Fuc <sub>6</sub> Hex <sub>9</sub> HexNAC <sub>9</sub>   | 5520.7 | 4.04  |
| NeuAc <sub>2</sub> Fuc <sub>4</sub> Hex <sub>9</sub> HexNAC <sub>9</sub>   | 5535.7 | 10.52 |
| NeuAc <sub>1</sub> Fuc <sub>5</sub> Hex <sub>10</sub> HexNAC <sub>9</sub>  | 5550.3 | 31.57 |
| NeuAc <sub>2</sub> Fuc <sub>3</sub> Hex <sub>10</sub> HexNAC <sub>9</sub>  | 5564.3 | 37.41 |
| NeuAc <sub>3</sub> Fuc <sub>1</sub> Hex <sub>10</sub> HexNAC <sub>9</sub>  | 5577.7 | 45.83 |
| NeuAc <sub>1</sub> Fuc <sub>4</sub> Hex <sub>10</sub> HexNAC <sub>10</sub> | 5622.6 | 6.06  |
| NeuAc <sub>2</sub> Fuc <sub>6</sub> Hex <sub>9</sub> HexNAC <sub>8</sub>   | 5637.7 | 11.57 |
| NeuAc <sub>1</sub> Fuc <sub>3</sub> Hex <sub>11</sub> HexNAC <sub>10</sub> | 5651.6 | 25.17 |
| NeuAc <sub>2</sub> Fuc <sub>1</sub> Hex <sub>11</sub> HexNAC <sub>10</sub> | 5665.1 | 53.08 |
| NeuAc <sub>2</sub> Fuc <sub>5</sub> Hex <sub>9</sub> HexNAC <sub>9</sub>   | 5709.5 | 4.77  |
| NeuAc <sub>1</sub> Fuc <sub>6</sub> Hex <sub>10</sub> HexNAC <sub>9</sub>  | 5724.6 | 10.51 |
| NeuAc <sub>2</sub> Fuc <sub>4</sub> Hex <sub>10</sub> HexNAC <sub>9</sub>  | 5738.5 | 24.40 |
| NeuAc <sub>1</sub> Fuc <sub>1</sub> Hex <sub>12</sub> HexNAC <sub>11</sub> | 5752.5 | 31.07 |
| NeuAc <sub>4</sub> Hex <sub>10</sub> HexNAC <sub>9</sub>                   | 5765.0 | 9.64  |
| NeuAc <sub>1</sub> Fuc <sub>5</sub> Hex <sub>10</sub> HexNAC <sub>10</sub> | 5796.4 | 3.67  |
| NeuAc <sub>2</sub> Fuc <sub>3</sub> Hex <sub>10</sub> HexNAC <sub>10</sub> | 5811.0 | 6.18  |
| NeuAc <sub>1</sub> Fuc <sub>4</sub> Hex <sub>11</sub> HexNAC <sub>10</sub> | 5825.5 | 19.21 |
| NeuAc <sub>2</sub> Fuc <sub>2</sub> Hex <sub>11</sub> HexNAC <sub>10</sub> | 5839.3 | 23.07 |
| NeuAc <sub>3</sub> Hex <sub>11</sub> HexNAC <sub>10</sub>                  | 5851.1 | 40.52 |
| NeuAc <sub>2</sub> Fuc <sub>6</sub> Hex <sub>9</sub> HexNAC <sub>9</sub>   | 5883.0 | 2.97  |
| NeuAc <sub>1</sub> Fuc <sub>3</sub> Hex <sub>11</sub> HexNAC <sub>11</sub> | 5898.0 | 5.00  |
| NeuAc <sub>2</sub> Fuc <sub>5</sub> Hex <sub>10</sub> HexNAC <sub>9</sub>  | 5912.1 | 16.32 |

|                                                                            |        |       |
|----------------------------------------------------------------------------|--------|-------|
| NeuAc <sub>1</sub> Fuc <sub>2</sub> Hex <sub>12</sub> HexNAc <sub>11</sub> | 5926.3 | 17.95 |
| NeuAc <sub>4</sub> Fuc <sub>1</sub> Hex <sub>10</sub> HexNAc <sub>9</sub>  | 5939.3 | 25.86 |
| NeuAc <sub>1</sub> Fuc <sub>6</sub> Hex <sub>10</sub> HexNAc <sub>10</sub> | 5970.0 | 2.33  |
| NeuAc <sub>2</sub> Fuc <sub>4</sub> Hex <sub>10</sub> HexNAc <sub>10</sub> | 5985.2 | 4.82  |
| NeuAc <sub>1</sub> Fuc <sub>5</sub> Hex <sub>11</sub> HexNAc <sub>10</sub> | 5999.8 | 15.32 |
| NeuAc <sub>2</sub> Fuc <sub>3</sub> Hex <sub>11</sub> HexNAc <sub>10</sub> | 6013.6 | 19.75 |
| NeuAc <sub>3</sub> Fuc <sub>1</sub> Hex <sub>11</sub> HexNAc <sub>10</sub> | 6026.8 | 30.77 |
| NeuAc <sub>1</sub> Fuc <sub>4</sub> Hex <sub>11</sub> HexNAc <sub>11</sub> | 6072.1 | 3.43  |
| NeuAc <sub>2</sub> Fuc <sub>6</sub> Hex <sub>10</sub> HexNAc <sub>9</sub>  | 6087.1 | 7.46  |
| NeuAc <sub>1</sub> Fuc <sub>3</sub> Hex <sub>12</sub> HexNAc <sub>11</sub> | 6100.9 | 14.37 |
| NeuAc <sub>2</sub> Fuc <sub>1</sub> Hex <sub>12</sub> HexNAc <sub>11</sub> | 6114.7 | 27.87 |
| NeuAc <sub>2</sub> Fuc <sub>5</sub> Hex <sub>10</sub> HexNAc <sub>10</sub> | 6159.2 | 2.88  |
| NeuAc <sub>1</sub> Fuc <sub>6</sub> Hex <sub>11</sub> HexNAc <sub>10</sub> | 6174.1 | 6.34  |
| NeuAc <sub>2</sub> Fuc <sub>4</sub> Hex <sub>11</sub> HexNAc <sub>10</sub> | 6187.8 | 13.37 |
| NeuAc <sub>1</sub> Fuc <sub>1</sub> Hex <sub>13</sub> HexNAc <sub>12</sub> | 6202.1 | 16.80 |
| NeuAc <sub>4</sub> Hex <sub>11</sub> HexNAc <sub>10</sub>                  | 6214.9 | 2.28  |
| NeuAc <sub>1</sub> Fuc <sub>5</sub> Hex <sub>11</sub> HexNAc <sub>11</sub> | 6246.1 | 1.96  |
| NeuAc <sub>2</sub> Fuc <sub>3</sub> Hex <sub>11</sub> HexNAc <sub>11</sub> | 6260.6 | 3.52  |
| NeuAc <sub>1</sub> Fuc <sub>4</sub> Hex <sub>12</sub> HexNAc <sub>11</sub> | 6274.8 | 10.70 |
| NeuAc <sub>2</sub> Fuc <sub>2</sub> Hex <sub>12</sub> HexNAc <sub>11</sub> | 6289.0 | 12.41 |
| NeuAc <sub>3</sub> Hex <sub>12</sub> HexNAc <sub>11</sub>                  | 6301.2 | 8.96  |
| NeuAc <sub>2</sub> Fuc <sub>6</sub> Hex <sub>10</sub> HexNAc <sub>10</sub> | 6332.8 | 1.77  |
| NeuAc <sub>1</sub> Fuc <sub>3</sub> Hex <sub>12</sub> HexNAc <sub>12</sub> | 6347.5 | 3.90  |
| NeuAc <sub>2</sub> Fuc <sub>5</sub> Hex <sub>11</sub> HexNAc <sub>10</sub> | 6361.7 | 11.12 |
| NeuAc <sub>1</sub> Fuc <sub>2</sub> Hex <sub>13</sub> HexNAc <sub>12</sub> | 6375.7 | 10.53 |
| NeuAc <sub>4</sub> Fuc <sub>1</sub> Hex <sub>11</sub> HexNAc <sub>10</sub> | 6388.9 | 13.97 |
| NeuAc <sub>1</sub> Fuc <sub>6</sub> Hex <sub>11</sub> HexNAc <sub>11</sub> | 6419.7 | 1.62  |
| NeuAc <sub>2</sub> Fuc <sub>4</sub> Hex <sub>11</sub> HexNAc <sub>11</sub> | 6434.6 | 3.04  |
| NeuAc <sub>1</sub> Fuc <sub>5</sub> Hex <sub>12</sub> HexNAc <sub>11</sub> | 6449.1 | 8.11  |
| NeuAc <sub>2</sub> Fuc <sub>3</sub> Hex <sub>12</sub> HexNAc <sub>11</sub> | 6463.2 | 10.82 |
| NeuAc <sub>3</sub> Fuc <sub>1</sub> Hex <sub>12</sub> HexNAc <sub>11</sub> | 6476.5 | 16.29 |
| NeuAc <sub>1</sub> Fuc <sub>4</sub> Hex <sub>12</sub> HexNAc <sub>12</sub> | 6521.6 | 2.27  |
| NeuAc <sub>2</sub> Fuc <sub>6</sub> Hex <sub>11</sub> HexNAc <sub>10</sub> | 6536.4 | 5.12  |
| NeuAc <sub>1</sub> Fuc <sub>3</sub> Hex <sub>13</sub> HexNAc <sub>12</sub> | 6550.4 | 9.00  |
| NeuAc <sub>2</sub> Fuc <sub>1</sub> Hex <sub>13</sub> HexNAc <sub>12</sub> | 6564.2 | 15.45 |
| NeuAc <sub>2</sub> Fuc <sub>5</sub> Hex <sub>11</sub> HexNAc <sub>11</sub> | 6608.5 | 1.80  |
| NeuAc <sub>1</sub> Fuc <sub>6</sub> Hex <sub>12</sub> HexNAc <sub>11</sub> | 6623.5 | 3.70  |
| NeuAc <sub>2</sub> Fuc <sub>4</sub> Hex <sub>12</sub> HexNAc <sub>11</sub> | 6637.2 | 7.34  |
| NeuAc <sub>1</sub> Fuc <sub>1</sub> Hex <sub>14</sub> HexNAc <sub>13</sub> | 6651.5 | 9.22  |
| NeuAc <sub>4</sub> Hex <sub>12</sub> HexNAc <sub>11</sub>                  | 6664.2 | 1.10  |
| NeuAc <sub>1</sub> Fuc <sub>5</sub> Hex <sub>12</sub> HexNAc <sub>12</sub> | 6695.2 | 1.20  |
| NeuAc <sub>2</sub> Fuc <sub>3</sub> Hex <sub>12</sub> HexNAc <sub>12</sub> | 6710.0 | 2.35  |
| NeuAc <sub>1</sub> Fuc <sub>4</sub> Hex <sub>13</sub> HexNAc <sub>12</sub> | 6724.1 | 6.53  |
| NeuAc <sub>2</sub> Fuc <sub>2</sub> Hex <sub>13</sub> HexNAc <sub>12</sub> | 6738.5 | 7.39  |
| NeuAc <sub>3</sub> Hex <sub>13</sub> HexNAc <sub>12</sub>                  | 6750.8 | 5.29  |

|                                                                            |        |      |
|----------------------------------------------------------------------------|--------|------|
| NeuAc <sub>2</sub> Fuc <sub>6</sub> Hex <sub>11</sub> HexNAc <sub>11</sub> | 6782.2 | 1.24 |
| NeuAc <sub>1</sub> Fuc <sub>3</sub> Hex <sub>13</sub> HexNAc <sub>13</sub> | 6797.1 | 2.66 |
| NeuAc <sub>2</sub> Fuc <sub>5</sub> Hex <sub>12</sub> HexNAc <sub>11</sub> | 6811.1 | 6.54 |
| NeuAc <sub>1</sub> Fuc <sub>2</sub> Hex <sub>14</sub> HexNAc <sub>13</sub> | 6825.1 | 5.87 |
| NeuAc <sub>4</sub> Fuc <sub>1</sub> Hex <sub>12</sub> HexNAc <sub>11</sub> | 6838.6 | 7.10 |
| NeuAc <sub>1</sub> Fuc <sub>6</sub> Hex <sub>12</sub> HexNAc <sub>12</sub> | 6869.2 | 0.88 |
| NeuAc <sub>2</sub> Fuc <sub>4</sub> Hex <sub>12</sub> HexNAc <sub>12</sub> | 6884.2 | 1.85 |
| NeuAc <sub>1</sub> Fuc <sub>5</sub> Hex <sub>13</sub> HexNAc <sub>12</sub> | 6898.5 | 4.53 |
| NeuAc <sub>2</sub> Fuc <sub>3</sub> Hex <sub>13</sub> HexNAc <sub>12</sub> | 6912.6 | 6.27 |
| NeuAc <sub>3</sub> Fuc <sub>1</sub> Hex <sub>13</sub> HexNAc <sub>12</sub> | 6926.0 | 9.86 |
| NeuAc <sub>1</sub> Fuc <sub>4</sub> Hex <sub>13</sub> HexNAc <sub>13</sub> | 6970.9 | 1.59 |
| NeuAc <sub>2</sub> Fuc <sub>6</sub> Hex <sub>12</sub> HexNAc <sub>11</sub> | 6985.9 | 3.41 |
| NeuAc <sub>1</sub> Fuc <sub>3</sub> Hex <sub>14</sub> HexNAc <sub>13</sub> | 6999.8 | 5.41 |
| NeuAc <sub>2</sub> Fuc <sub>1</sub> Hex <sub>14</sub> HexNAc <sub>13</sub> | 7013.8 | 8.38 |
| NeuAc <sub>2</sub> Fuc <sub>5</sub> Hex <sub>12</sub> HexNAc <sub>12</sub> | 7057.8 | 1.11 |
| NeuAc <sub>1</sub> Fuc <sub>6</sub> Hex <sub>13</sub> HexNAc <sub>12</sub> | 7072.7 | 2.04 |
| NeuAc <sub>2</sub> Fuc <sub>4</sub> Hex <sub>13</sub> HexNAc <sub>12</sub> | 7086.5 | 4.26 |
| NeuAc <sub>1</sub> Fuc <sub>1</sub> Hex <sub>15</sub> HexNAc <sub>14</sub> | 7101.0 | 5.26 |
| NeuAc <sub>4</sub> Hex <sub>13</sub> HexNAc <sub>12</sub>                  | 7113.7 | 0.96 |
| NeuAc <sub>1</sub> Fuc <sub>5</sub> Hex <sub>13</sub> HexNAc <sub>13</sub> | 7144.4 | 0.85 |
| NeuAc <sub>2</sub> Fuc <sub>3</sub> Hex <sub>13</sub> HexNAc <sub>13</sub> | 7159.3 | 1.67 |
| NeuAc <sub>1</sub> Fuc <sub>4</sub> Hex <sub>14</sub> HexNAc <sub>13</sub> | 7173.4 | 4.21 |
| NeuAc <sub>2</sub> Fuc <sub>2</sub> Hex <sub>14</sub> HexNAc <sub>13</sub> | 7187.9 | 3.95 |
| NeuAc <sub>3</sub> Hex <sub>14</sub> HexNAc <sub>13</sub>                  | 7200.8 | 2.41 |
| NeuAc <sub>2</sub> Fuc <sub>6</sub> Hex <sub>12</sub> HexNAc <sub>12</sub> | 7231.7 | 0.67 |
| NeuAc <sub>1</sub> Fuc <sub>3</sub> Hex <sub>14</sub> HexNAc <sub>14</sub> | 7246.4 | 1.60 |
| NeuAc <sub>2</sub> Fuc <sub>5</sub> Hex <sub>13</sub> HexNAc <sub>12</sub> | 7260.6 | 4.00 |
| NeuAc <sub>1</sub> Fuc <sub>2</sub> Hex <sub>15</sub> HexNAc <sub>14</sub> | 7274.5 | 3.35 |
| NeuAc <sub>4</sub> Fuc <sub>1</sub> Hex <sub>13</sub> HexNAc <sub>12</sub> | 7288.0 | 3.95 |
| NeuAc <sub>1</sub> Fuc <sub>6</sub> Hex <sub>13</sub> HexNAc <sub>13</sub> | 7318.4 | 0.59 |
| NeuAc <sub>2</sub> Fuc <sub>4</sub> Hex <sub>13</sub> HexNAc <sub>13</sub> | 7333.3 | 1.19 |
| NeuAc <sub>1</sub> Fuc <sub>5</sub> Hex <sub>14</sub> HexNAc <sub>13</sub> | 7347.8 | 2.74 |
| NeuAc <sub>2</sub> Fuc <sub>3</sub> Hex <sub>14</sub> HexNAc <sub>13</sub> | 7362.1 | 3.54 |
| NeuAc <sub>3</sub> Fuc <sub>1</sub> Hex <sub>14</sub> HexNAc <sub>13</sub> | 7375.6 | 5.58 |
| NeuAc <sub>1</sub> Fuc <sub>4</sub> Hex <sub>14</sub> HexNAc <sub>14</sub> | 7420.5 | 0.98 |
| NeuAc <sub>2</sub> Fuc <sub>6</sub> Hex <sub>13</sub> HexNAc <sub>12</sub> | 7435.1 | 1.98 |
| NeuAc <sub>1</sub> Fuc <sub>3</sub> Hex <sub>15</sub> HexNAc <sub>14</sub> | 7449.2 | 3.17 |
| NeuAc <sub>2</sub> Fuc <sub>1</sub> Hex <sub>15</sub> HexNAc <sub>14</sub> | 7463.4 | 4.52 |
| NeuAc <sub>2</sub> Fuc <sub>5</sub> Hex <sub>13</sub> HexNAc <sub>13</sub> | 7507.1 | 0.72 |
| NeuAc <sub>1</sub> Fuc <sub>6</sub> Hex <sub>14</sub> HexNAc <sub>13</sub> | 7521.9 | 1.27 |
| NeuAc <sub>2</sub> Fuc <sub>4</sub> Hex <sub>14</sub> HexNAc <sub>13</sub> | 7536.1 | 2.43 |
| NeuAc <sub>1</sub> Fuc <sub>1</sub> Hex <sub>16</sub> HexNAc <sub>15</sub> | 7550.5 | 2.96 |
| NeuAc <sub>4</sub> Hex <sub>14</sub> HexNAc <sub>13</sub>                  | 7563.1 | 0.54 |
| NeuAc <sub>1</sub> Fuc <sub>5</sub> Hex <sub>14</sub> HexNAc <sub>14</sub> | 7594.0 | 0.52 |
| NeuAc <sub>2</sub> Fuc <sub>3</sub> Hex <sub>14</sub> HexNAc <sub>14</sub> | 7608.9 | 1.03 |

|                                                                            |        |      |
|----------------------------------------------------------------------------|--------|------|
| NeuAc <sub>1</sub> Fuc <sub>4</sub> Hex <sub>15</sub> HexNAc <sub>14</sub> | 7622.9 | 2.38 |
| NeuAc <sub>2</sub> Fuc <sub>2</sub> Hex <sub>15</sub> HexNAc <sub>14</sub> | 7637.4 | 2.22 |
| NeuAc <sub>3</sub> Hex <sub>15</sub> HexNAc <sub>14</sub>                  | 7650.3 | 1.38 |
| NeuAc <sub>2</sub> Fuc <sub>6</sub> Hex <sub>13</sub> HexNAc <sub>13</sub> | 7680.8 | 0.35 |
| NeuAc <sub>1</sub> Fuc <sub>3</sub> Hex <sub>15</sub> HexNAc <sub>15</sub> | 7695.8 | 0.96 |
| NeuAc <sub>2</sub> Fuc <sub>5</sub> Hex <sub>14</sub> HexNAc <sub>13</sub> | 7710.0 | 2.40 |
| NeuAc <sub>1</sub> Fuc <sub>2</sub> Hex <sub>16</sub> HexNAc <sub>15</sub> | 7723.9 | 1.81 |
| NeuAc <sub>4</sub> Fuc <sub>1</sub> Hex <sub>14</sub> HexNAc <sub>13</sub> | 7737.5 | 2.28 |
| NeuAc <sub>1</sub> Fuc <sub>6</sub> Hex <sub>14</sub> HexNAc <sub>14</sub> | 7768.1 | 0.35 |
| NeuAc <sub>2</sub> Fuc <sub>4</sub> Hex <sub>14</sub> HexNAc <sub>14</sub> | 7782.8 | 0.70 |
| NeuAc <sub>1</sub> Fuc <sub>5</sub> Hex <sub>15</sub> HexNAc <sub>14</sub> | 7797.1 | 1.56 |
| NeuAc <sub>2</sub> Fuc <sub>3</sub> Hex <sub>15</sub> HexNAc <sub>14</sub> | 7811.4 | 1.99 |
| NeuAc <sub>3</sub> Fuc <sub>1</sub> Hex <sub>15</sub> HexNAc <sub>14</sub> | 7825.1 | 3.18 |
| NeuAc <sub>1</sub> Fuc <sub>4</sub> Hex <sub>15</sub> HexNAc <sub>15</sub> | 7869.7 | 0.59 |
| NeuAc <sub>2</sub> Fuc <sub>6</sub> Hex <sub>14</sub> HexNAc <sub>13</sub> | 7884.6 | 1.10 |
| NeuAc <sub>1</sub> Fuc <sub>3</sub> Hex <sub>16</sub> HexNAc <sub>15</sub> | 7898.5 | 1.74 |
| NeuAc <sub>2</sub> Fuc <sub>1</sub> Hex <sub>16</sub> HexNAc <sub>15</sub> | 7912.8 | 2.45 |
| NeuAc <sub>2</sub> Fuc <sub>5</sub> Hex <sub>14</sub> HexNAc <sub>14</sub> | 7956.2 | 0.41 |
| NeuAc <sub>1</sub> Fuc <sub>6</sub> Hex <sub>15</sub> HexNAc <sub>14</sub> | 7971.1 | 0.69 |
| NeuAc <sub>2</sub> Fuc <sub>4</sub> Hex <sub>15</sub> HexNAc <sub>14</sub> | 7985.2 | 1.39 |
| NeuAc <sub>1</sub> Fuc <sub>1</sub> Hex <sub>17</sub> HexNAc <sub>16</sub> | 7999.9 | 1.57 |
| NeuAc <sub>4</sub> Hex <sub>15</sub> HexNAc <sub>14</sub>                  | 8012.1 | 0.39 |
| NeuAc <sub>1</sub> Fuc <sub>5</sub> Hex <sub>15</sub> HexNAc <sub>15</sub> | 8043.3 | 0.27 |
| NeuAc <sub>2</sub> Fuc <sub>3</sub> Hex <sub>15</sub> HexNAc <sub>15</sub> | 8058.3 | 0.66 |
| NeuAc <sub>1</sub> Fuc <sub>4</sub> Hex <sub>16</sub> HexNAc <sub>15</sub> | 8072.0 | 1.51 |
| NeuAc <sub>2</sub> Fuc <sub>2</sub> Hex <sub>16</sub> HexNAc <sub>15</sub> | 8087.0 | 1.09 |
| NeuAc <sub>3</sub> Hex <sub>16</sub> HexNAc <sub>15</sub>                  | 8100.0 | 0.78 |
| NeuAc <sub>2</sub> Fuc <sub>6</sub> Hex <sub>14</sub> HexNAc <sub>14</sub> | 8130.0 | 0.25 |
| NeuAc <sub>1</sub> Fuc <sub>3</sub> Hex <sub>16</sub> HexNAc <sub>16</sub> | 8145.0 | 0.60 |
| NeuAc <sub>2</sub> Fuc <sub>5</sub> Hex <sub>15</sub> HexNAc <sub>14</sub> | 8159.3 | 1.41 |
| NeuAc <sub>1</sub> Fuc <sub>2</sub> Hex <sub>17</sub> HexNAc <sub>16</sub> | 8173.5 | 0.98 |
| NeuAc <sub>4</sub> Fuc <sub>1</sub> Hex <sub>15</sub> HexNAc <sub>14</sub> | 8186.9 | 1.31 |
| NeuAc <sub>1</sub> Fuc <sub>6</sub> Hex <sub>15</sub> HexNAc <sub>15</sub> | 8217.4 | 0.22 |
| NeuAc <sub>2</sub> Fuc <sub>4</sub> Hex <sub>15</sub> HexNAc <sub>15</sub> | 8232.3 | 0.45 |
| NeuAc <sub>1</sub> Fuc <sub>5</sub> Hex <sub>16</sub> HexNAc <sub>15</sub> | 8246.4 | 0.92 |
| NeuAc <sub>2</sub> Fuc <sub>3</sub> Hex <sub>16</sub> HexNAc <sub>15</sub> | 8260.8 | 1.02 |
| NeuAc <sub>3</sub> Fuc <sub>1</sub> Hex <sub>16</sub> HexNAc <sub>15</sub> | 8274.5 | 1.78 |
| NeuAc <sub>1</sub> Fuc <sub>4</sub> Hex <sub>16</sub> HexNAc <sub>16</sub> | 8318.8 | 0.34 |
| NeuAc <sub>2</sub> Fuc <sub>6</sub> Hex <sub>15</sub> HexNAc <sub>14</sub> | 8333.9 | 0.63 |
| NeuAc <sub>1</sub> Fuc <sub>3</sub> Hex <sub>17</sub> HexNAc <sub>16</sub> | 8347.8 | 0.97 |
| NeuAc <sub>2</sub> Fuc <sub>1</sub> Hex <sub>17</sub> HexNAc <sub>16</sub> | 8362.2 | 1.39 |
| NeuAc <sub>2</sub> Fuc <sub>5</sub> Hex <sub>15</sub> HexNAc <sub>15</sub> | 8405.6 | 0.30 |
| NeuAc <sub>1</sub> Fuc <sub>6</sub> Hex <sub>16</sub> HexNAc <sub>15</sub> | 8420.7 | 0.40 |
| NeuAc <sub>2</sub> Fuc <sub>4</sub> Hex <sub>16</sub> HexNAc <sub>15</sub> | 8434.4 | 0.78 |
| NeuAc <sub>1</sub> Fuc <sub>1</sub> Hex <sub>18</sub> HexNAc <sub>17</sub> | 8449.4 | 0.80 |

|                                                                            |        |       |
|----------------------------------------------------------------------------|--------|-------|
| NeuAc <sub>4</sub> Hex <sub>16</sub> HexNAc <sub>15</sub>                  | 8462.0 | 0.19  |
| NeuAc <sub>1</sub> Fuc <sub>5</sub> Hex <sub>16</sub> HexNAc <sub>16</sub> | 8492.7 | 0.16  |
| NeuAc <sub>2</sub> Fuc <sub>3</sub> Hex <sub>16</sub> HexNAc <sub>16</sub> | 8507.2 | 0.40  |
| NeuAc <sub>1</sub> Fuc <sub>4</sub> Hex <sub>17</sub> HexNAc <sub>16</sub> | 8521.1 | 0.87  |
| NeuAc <sub>2</sub> Fuc <sub>2</sub> Hex <sub>17</sub> HexNAc <sub>16</sub> | 8536.1 | 0.75  |
| NeuAc <sub>3</sub> Hex <sub>17</sub> HexNAc <sub>16</sub>                  | 8549.2 | 0.47  |
| NeuAc <sub>2</sub> Fuc <sub>6</sub> Hex <sub>15</sub> HexNAc <sub>15</sub> | 8579.7 | 0.14  |
| NeuAc <sub>1</sub> Fuc <sub>3</sub> Hex <sub>17</sub> HexNAc <sub>17</sub> | 8594.0 | 0.36  |
| NeuAc <sub>2</sub> Fuc <sub>5</sub> Hex <sub>16</sub> HexNAc <sub>15</sub> | 8608.5 | 0.85  |
| NeuAc <sub>1</sub> Fuc <sub>2</sub> Hex <sub>18</sub> HexNAc <sub>17</sub> | 8623.3 | 0.54  |
| NeuAc <sub>4</sub> Fuc <sub>1</sub> Hex <sub>16</sub> HexNAc <sub>15</sub> | 8636.5 | 0.75  |
| NeuAc <sub>1</sub> Fuc <sub>6</sub> Hex <sub>16</sub> HexNAc <sub>16</sub> | 8666.7 | 0.17  |
| NeuAc <sub>2</sub> Fuc <sub>4</sub> Hex <sub>16</sub> HexNAc <sub>16</sub> | 8681.7 | 0.25  |
| NeuAc <sub>1</sub> Fuc <sub>5</sub> Hex <sub>17</sub> HexNAc <sub>16</sub> | 8696.2 | 0.49  |
| NeuAc <sub>2</sub> Fuc <sub>3</sub> Hex <sub>17</sub> HexNAc <sub>16</sub> | 8710.2 | 0.55  |
| NeuAc <sub>3</sub> Fuc <sub>1</sub> Hex <sub>17</sub> HexNAc <sub>16</sub> | 8724.1 | 0.98  |
| NeuAc <sub>1</sub> Fuc <sub>4</sub> Hex <sub>17</sub> HexNAc <sub>17</sub> | 8768.3 | 0.19  |
| NeuAc <sub>2</sub> Fuc <sub>6</sub> Hex <sub>16</sub> HexNAc <sub>15</sub> | 8783.0 | 0.39  |
| NeuAc <sub>1</sub> Fuc <sub>3</sub> Hex <sub>18</sub> HexNAc <sub>17</sub> | 8797.1 | 0.50  |
| NeuAc <sub>2</sub> Fuc <sub>1</sub> Hex <sub>18</sub> HexNAc <sub>17</sub> | 8811.7 | 0.67  |
| NeuAc <sub>2</sub> Fuc <sub>5</sub> Hex <sub>16</sub> HexNAc <sub>16</sub> | 8854.8 | 0.18  |
| NeuAc <sub>1</sub> Fuc <sub>6</sub> Hex <sub>17</sub> HexNAc <sub>16</sub> | 8869.9 | 0.26  |
| NeuAc <sub>2</sub> Fuc <sub>4</sub> Hex <sub>17</sub> HexNAc <sub>16</sub> | 8883.9 | 0.44  |
| NeuAc <sub>1</sub> Fuc <sub>1</sub> Hex <sub>19</sub> HexNAc <sub>18</sub> | 8898.9 | 0.44  |
| NeuAc <sub>4</sub> Hex <sub>17</sub> HexNAc <sub>16</sub>                  | 8911.2 | 0.12  |
| NeuAc <sub>1</sub> Fuc <sub>5</sub> Hex <sub>17</sub> HexNAc <sub>17</sub> | 8942.2 | 0.10  |
| NeuAc <sub>2</sub> Fuc <sub>3</sub> Hex <sub>17</sub> HexNAc <sub>17</sub> | 8956.9 | 0.26  |
| NeuAc <sub>1</sub> Fuc <sub>4</sub> Hex <sub>18</sub> HexNAc <sub>17</sub> | 8970.3 | 0.55  |
| NeuAc <sub>2</sub> Fuc <sub>2</sub> Hex <sub>18</sub> HexNAc <sub>17</sub> | 8985.8 | 0.37  |
| NeuAc <sub>3</sub> Hex <sub>18</sub> HexNAc <sub>17</sub>                  | 8998.8 | 0.27  |
| NeuAc <sub>2</sub> Fuc <sub>6</sub> Hex <sub>16</sub> HexNAc <sub>16</sub> | 9029.0 | 0.13  |
| NeuAc <sub>1</sub> Fuc <sub>3</sub> Hex <sub>18</sub> HexNAc <sub>18</sub> | 9043.5 | 0.24  |
| NeuAc <sub>2</sub> Fuc <sub>5</sub> Hex <sub>17</sub> HexNAc <sub>16</sub> | 9058.0 | 0.49  |
| NeuAc <sub>1</sub> Fuc <sub>2</sub> Hex <sub>19</sub> HexNAc <sub>18</sub> | 9072.8 | 0.25  |
| NeuAc <sub>4</sub> Fuc <sub>1</sub> Hex <sub>17</sub> HexNAc <sub>16</sub> | 9085.9 | 0.43  |
| NeuAc <sub>1</sub> Fuc <sub>6</sub> Hex <sub>17</sub> HexNAc <sub>17</sub> | 9115.8 | 0.11  |
| NeuAc <sub>2</sub> Fuc <sub>4</sub> Hex <sub>17</sub> HexNAc <sub>17</sub> | 9130.8 | 0.17  |
| NeuAc <sub>1</sub> Fuc <sub>5</sub> Hex <sub>18</sub> HexNAc <sub>17</sub> | 9145.2 | 0.32  |
| NeuAc <sub>2</sub> Fuc <sub>3</sub> Hex <sub>18</sub> HexNAc <sub>17</sub> | 9159.5 | 0.32  |
| NeuAc <sub>3</sub> Fuc <sub>1</sub> Hex <sub>18</sub> HexNAc <sub>17</sub> | 9173.7 | 0.55  |
| NeuAc <sub>1</sub> Fuc <sub>4</sub> Hex <sub>18</sub> HexNAc <sub>18</sub> | 9217.7 | 14.00 |
| NeuAc <sub>2</sub> Fuc <sub>6</sub> Hex <sub>17</sub> HexNAc <sub>16</sub> | 9232.3 | 0.18  |
| NeuAc <sub>1</sub> Fuc <sub>3</sub> Hex <sub>19</sub> HexNAc <sub>18</sub> | 9246.8 | 0.27  |
| NeuAc <sub>2</sub> Fuc <sub>1</sub> Hex <sub>19</sub> HexNAc <sub>18</sub> | 9261.1 | 0.36  |
| NeuAc <sub>2</sub> Fuc <sub>5</sub> Hex <sub>17</sub> HexNAc <sub>17</sub> | 9304.3 | 0.12  |

|                                                                            |         |      |
|----------------------------------------------------------------------------|---------|------|
| NeuAc <sub>1</sub> Fuc <sub>6</sub> Hex <sub>18</sub> HexNAC <sub>17</sub> | 9319.2  | 0.14 |
| NeuAc <sub>2</sub> Fuc <sub>4</sub> Hex <sub>18</sub> HexNAC <sub>17</sub> | 9333.1  | 0.23 |
| NeuAc <sub>1</sub> Fuc <sub>1</sub> Hex <sub>20</sub> HexNAC <sub>19</sub> | 9348.0  | 0.22 |
| NeuAc <sub>4</sub> Hex <sub>18</sub> HexNAC <sub>17</sub>                  | 9361.5  | 0.08 |
| NeuAc <sub>1</sub> Fuc <sub>5</sub> Hex <sub>18</sub> HexNAC <sub>18</sub> | 9391.4  | 0.07 |
| NeuAc <sub>2</sub> Fuc <sub>3</sub> Hex <sub>18</sub> HexNAC <sub>18</sub> | 9406.1  | 0.17 |
| NeuAc <sub>1</sub> Fuc <sub>4</sub> Hex <sub>19</sub> HexNAC <sub>18</sub> | 9419.7  | 0.38 |
| NeuAc <sub>2</sub> Fuc <sub>2</sub> Hex <sub>19</sub> HexNAC <sub>18</sub> | 9435.1  | 0.15 |
| NeuAc <sub>3</sub> Hex <sub>19</sub> HexNAC <sub>18</sub>                  | 9448.3  | 0.17 |
| NeuAc <sub>2</sub> Fuc <sub>6</sub> Hex <sub>17</sub> HexNAC <sub>17</sub> | 9478.8  | 0.09 |
| NeuAc <sub>1</sub> Fuc <sub>3</sub> Hex <sub>19</sub> HexNAC <sub>19</sub> | 9493.4  | 0.14 |
| NeuAc <sub>2</sub> Fuc <sub>5</sub> Hex <sub>18</sub> HexNAC <sub>17</sub> | 9507.2  | 0.28 |
| NeuAc <sub>1</sub> Fuc <sub>2</sub> Hex <sub>20</sub> HexNAC <sub>19</sub> | 9521.9  | 0.15 |
| NeuAc <sub>4</sub> Fuc <sub>1</sub> Hex <sub>18</sub> HexNAC <sub>17</sub> | 9535.4  | 0.26 |
| NeuAc <sub>1</sub> Fuc <sub>6</sub> Hex <sub>18</sub> HexNAC <sub>18</sub> | 9566.0  | 0.07 |
| NeuAc <sub>2</sub> Fuc <sub>4</sub> Hex <sub>18</sub> HexNAC <sub>18</sub> | 9580.5  | 0.09 |
| NeuAc <sub>1</sub> Fuc <sub>5</sub> Hex <sub>19</sub> HexNAC <sub>18</sub> | 9595.0  | 0.20 |
| NeuAc <sub>2</sub> Fuc <sub>3</sub> Hex <sub>19</sub> HexNAC <sub>18</sub> | 9609.3  | 0.16 |
| NeuAc <sub>3</sub> Fuc <sub>1</sub> Hex <sub>19</sub> HexNAC <sub>18</sub> | 9622.7  | 0.33 |
| NeuAc <sub>1</sub> Fuc <sub>4</sub> Hex <sub>19</sub> HexNAC <sub>19</sub> | 9667.1  | 0.07 |
| NeuAc <sub>2</sub> Fuc <sub>6</sub> Hex <sub>18</sub> HexNAC <sub>17</sub> | 9681.3  | 0.14 |
| NeuAc <sub>1</sub> Fuc <sub>3</sub> Hex <sub>20</sub> HexNAC <sub>19</sub> | 9695.7  | 0.16 |
| NeuAc <sub>2</sub> Fuc <sub>1</sub> Hex <sub>20</sub> HexNAC <sub>19</sub> | 9710.3  | 0.21 |
| NeuAc <sub>2</sub> Fuc <sub>5</sub> Hex <sub>18</sub> HexNAC <sub>18</sub> | 9753.3  | 0.08 |
| NeuAc <sub>1</sub> Fuc <sub>6</sub> Hex <sub>19</sub> HexNAC <sub>18</sub> | 9768.8  | 0.10 |
| NeuAc <sub>2</sub> Fuc <sub>4</sub> Hex <sub>19</sub> HexNAC <sub>18</sub> | 9782.5  | 0.17 |
| NeuAc <sub>1</sub> Fuc <sub>1</sub> Hex <sub>21</sub> HexNAC <sub>20</sub> | 9797.8  | 0.15 |
| NeuAc <sub>4</sub> Hex <sub>19</sub> HexNAC <sub>18</sub>                  | 9811.0  | 0.08 |
| NeuAc <sub>1</sub> Fuc <sub>5</sub> Hex <sub>19</sub> HexNAC <sub>19</sub> | 9841.0  | 0.06 |
| NeuAc <sub>2</sub> Fuc <sub>3</sub> Hex <sub>19</sub> HexNAC <sub>19</sub> | 9855.6  | 0.09 |
| NeuAc <sub>1</sub> Fuc <sub>4</sub> Hex <sub>20</sub> HexNAC <sub>19</sub> | 9869.5  | 0.24 |
| NeuAc <sub>2</sub> Fuc <sub>2</sub> Hex <sub>20</sub> HexNAC <sub>19</sub> | 9884.9  | 0.10 |
| NeuAc <sub>3</sub> Hex <sub>20</sub> HexNAC <sub>19</sub>                  | 9897.9  | 0.13 |
| NeuAc <sub>2</sub> Fuc <sub>6</sub> Hex <sub>18</sub> HexNAC <sub>18</sub> | 9928.9  | 0.08 |
| NeuAc <sub>1</sub> Fuc <sub>3</sub> Hex <sub>20</sub> HexNAC <sub>20</sub> | 9943.3  | 0.12 |
| NeuAc <sub>2</sub> Fuc <sub>5</sub> Hex <sub>19</sub> HexNAC <sub>18</sub> | 9956.3  | 0.20 |
| NeuAc <sub>1</sub> Fuc <sub>2</sub> Hex <sub>21</sub> HexNAC <sub>20</sub> | 9971.1  | 0.09 |
| NeuAc <sub>4</sub> Fuc <sub>1</sub> Hex <sub>19</sub> HexNAC <sub>18</sub> | 9985.2  | 0.15 |
| NeuAc <sub>1</sub> Fuc <sub>6</sub> Hex <sub>19</sub> HexNAC <sub>19</sub> | 10015.1 | 0.05 |
| NeuAc <sub>2</sub> Fuc <sub>4</sub> Hex <sub>19</sub> HexNAC <sub>19</sub> | 10030.2 | 0.08 |
| NeuAc <sub>1</sub> Fuc <sub>5</sub> Hex <sub>20</sub> HexNAC <sub>19</sub> | 10044.1 | 0.12 |
| NeuAc <sub>2</sub> Fuc <sub>3</sub> Hex <sub>20</sub> HexNAC <sub>19</sub> | 10058.7 | 0.11 |
| NeuAc <sub>3</sub> Fuc <sub>1</sub> Hex <sub>20</sub> HexNAC <sub>19</sub> | 10072.5 | 0.18 |
| NeuAc <sub>1</sub> Fuc <sub>4</sub> Hex <sub>20</sub> HexNAC <sub>20</sub> | 10116.3 | 0.07 |
| NeuAc <sub>2</sub> Fuc <sub>6</sub> Hex <sub>19</sub> HexNAC <sub>18</sub> | 10130.8 | 0.08 |

|                                                                            |         |      |
|----------------------------------------------------------------------------|---------|------|
| NeuAc <sub>1</sub> Fuc <sub>3</sub> Hex <sub>21</sub> HexNAc <sub>20</sub> | 10145.0 | 0.09 |
| NeuAc <sub>2</sub> Fuc <sub>1</sub> Hex <sub>21</sub> HexNAc <sub>20</sub> | 10160.3 | 0.13 |
| NeuAc <sub>2</sub> Fuc <sub>5</sub> Hex <sub>19</sub> HexNAc <sub>19</sub> | 10202.4 | 0.06 |
| NeuAc <sub>1</sub> Fuc <sub>6</sub> Hex <sub>20</sub> HexNAc <sub>19</sub> | 10218.4 | 0.08 |
| NeuAc <sub>2</sub> Fuc <sub>4</sub> Hex <sub>20</sub> HexNAc <sub>19</sub> | 10232.4 | 0.12 |
| NeuAc <sub>1</sub> Fuc <sub>1</sub> Hex <sub>22</sub> HexNAc <sub>21</sub> | 10247.5 | 0.09 |
| NeuAc <sub>4</sub> Hex <sub>20</sub> HexNAc <sub>19</sub>                  | 10258.8 | 0.03 |
| NeuAc <sub>1</sub> Fuc <sub>5</sub> Hex <sub>20</sub> HexNAc <sub>20</sub> | 10290.4 | 0.05 |
| NeuAc <sub>2</sub> Fuc <sub>3</sub> Hex <sub>20</sub> HexNAc <sub>20</sub> | 10304.8 | 0.09 |
| NeuAc <sub>1</sub> Fuc <sub>4</sub> Hex <sub>21</sub> HexNAc <sub>20</sub> | 10318.8 | 0.16 |
| NeuAc <sub>2</sub> Fuc <sub>2</sub> Hex <sub>21</sub> HexNAc <sub>20</sub> | 10334.6 | 0.07 |
| NeuAc <sub>3</sub> Hex <sub>21</sub> HexNAc <sub>20</sub>                  | 10346.8 | 0.11 |
| NeuAc <sub>2</sub> Fuc <sub>6</sub> Hex <sub>19</sub> HexNAc <sub>19</sub> | 10377.5 | 0.04 |
| NeuAc <sub>1</sub> Fuc <sub>3</sub> Hex <sub>21</sub> HexNAc <sub>21</sub> | 10391.8 | 0.07 |
| NeuAc <sub>2</sub> Fuc <sub>5</sub> Hex <sub>20</sub> HexNAc <sub>19</sub> | 10407.2 | 0.15 |
| NeuAc <sub>1</sub> Fuc <sub>2</sub> Hex <sub>22</sub> HexNAc <sub>21</sub> | 10421.6 | 0.05 |
| NeuAc <sub>4</sub> Fuc <sub>1</sub> Hex <sub>20</sub> HexNAc <sub>19</sub> | 10434.7 | 0.11 |
| NeuAc <sub>1</sub> Fuc <sub>6</sub> Hex <sub>20</sub> HexNAc <sub>20</sub> | 10464.1 | 0.05 |
| NeuAc <sub>2</sub> Fuc <sub>4</sub> Hex <sub>20</sub> HexNAc <sub>20</sub> | 10478.9 | 0.07 |
| NeuAc <sub>1</sub> Fuc <sub>5</sub> Hex <sub>21</sub> HexNAc <sub>20</sub> | 10493.5 | 0.06 |
| NeuAc <sub>2</sub> Fuc <sub>3</sub> Hex <sub>21</sub> HexNAc <sub>20</sub> | 10507.2 | 0.06 |
| NeuAc <sub>3</sub> Fuc <sub>1</sub> Hex <sub>21</sub> HexNAc <sub>20</sub> | 10522.5 | 0.12 |
| NeuAc <sub>1</sub> Fuc <sub>4</sub> Hex <sub>21</sub> HexNAc <sub>21</sub> | 10565.6 | 0.04 |
| NeuAc <sub>2</sub> Fuc <sub>6</sub> Hex <sub>20</sub> HexNAc <sub>19</sub> | 10580.7 | 0.05 |
| NeuAc <sub>1</sub> Fuc <sub>3</sub> Hex <sub>22</sub> HexNAc <sub>21</sub> | 10595.2 | 0.05 |
| NeuAc <sub>2</sub> Fuc <sub>1</sub> Hex <sub>22</sub> HexNAc <sub>21</sub> | 10609.3 | 0.10 |
| NeuAc <sub>2</sub> Fuc <sub>5</sub> Hex <sub>20</sub> HexNAc <sub>20</sub> | 10652.2 | 0.05 |
| NeuAc <sub>1</sub> Fuc <sub>6</sub> Hex <sub>21</sub> HexNAc <sub>20</sub> | 10667.3 | 0.06 |
| NeuAc <sub>2</sub> Fuc <sub>4</sub> Hex <sub>21</sub> HexNAc <sub>20</sub> | 10680.7 | 0.10 |
| NeuAc <sub>1</sub> Fuc <sub>1</sub> Hex <sub>23</sub> HexNAc <sub>22</sub> | 10696.5 | 0.05 |
| NeuAc <sub>4</sub> Hex <sub>21</sub> HexNAc <sub>20</sub>                  | 10709.6 | 0.03 |
| NeuAc <sub>1</sub> Fuc <sub>5</sub> Hex <sub>21</sub> HexNAc <sub>21</sub> | 10739.7 | 0.05 |
| NeuAc <sub>2</sub> Fuc <sub>3</sub> Hex <sub>21</sub> HexNAc <sub>21</sub> | 10754.9 | 0.05 |
| NeuAc <sub>1</sub> Fuc <sub>4</sub> Hex <sub>22</sub> HexNAc <sub>21</sub> | 10768.8 | 0.12 |
| NeuAc <sub>2</sub> Fuc <sub>2</sub> Hex <sub>22</sub> HexNAc <sub>21</sub> | 10783.7 | 0.08 |
| NeuAc <sub>3</sub> Hex <sub>22</sub> HexNAc <sub>21</sub>                  | 10796.0 | 0.08 |
| NeuAc <sub>2</sub> Fuc <sub>6</sub> Hex <sub>20</sub> HexNAc <sub>20</sub> | 10827.7 | 0.04 |
| NeuAc <sub>1</sub> Fuc <sub>3</sub> Hex <sub>22</sub> HexNAc <sub>22</sub> | 10841.3 | 0.06 |
| NeuAc <sub>2</sub> Fuc <sub>5</sub> Hex <sub>21</sub> HexNAc <sub>20</sub> | 10856.4 | 0.06 |
| NeuAc <sub>1</sub> Fuc <sub>2</sub> Hex <sub>23</sub> HexNAc <sub>22</sub> | 10871.2 | 0.03 |
| NeuAc <sub>4</sub> Fuc <sub>1</sub> Hex <sub>21</sub> HexNAc <sub>20</sub> | 10883.9 | 0.07 |
| NeuAc <sub>2</sub> Fuc <sub>4</sub> Hex <sub>21</sub> HexNAc <sub>21</sub> | 10929.3 | 0.05 |
| NeuAc <sub>1</sub> Fuc <sub>5</sub> Hex <sub>22</sub> HexNAc <sub>21</sub> | 10943.1 | 0.08 |
| NeuAc <sub>2</sub> Fuc <sub>3</sub> Hex <sub>22</sub> HexNAc <sub>21</sub> | 10957.2 | 0.07 |
| NeuAc <sub>3</sub> Fuc <sub>1</sub> Hex <sub>22</sub> HexNAc <sub>21</sub> | 10972.1 | 0.09 |



|                                                                            |         |      |
|----------------------------------------------------------------------------|---------|------|
| NeuAc <sub>1</sub> Fuc <sub>4</sub> Hex <sub>22</sub> HexNAC <sub>22</sub> | 11015.5 | 0.03 |
| NeuAc <sub>2</sub> Fuc <sub>6</sub> Hex <sub>21</sub> HexNAC <sub>20</sub> | 11029.3 | 0.04 |
| NeuAc <sub>1</sub> Fuc <sub>3</sub> Hex <sub>23</sub> HexNAC <sub>22</sub> | 11044.1 | 0.05 |
| NeuAc <sub>2</sub> Fuc <sub>1</sub> Hex <sub>23</sub> HexNAC <sub>22</sub> | 11059.7 | 0.07 |
| NeuAc <sub>2</sub> Fuc <sub>5</sub> Hex <sub>21</sub> HexNAC <sub>21</sub> | 11102.0 | 0.04 |
| NeuAc <sub>1</sub> Fuc <sub>6</sub> Hex <sub>22</sub> HexNAC <sub>21</sub> | 11118.3 | 0.06 |
| NeuAc <sub>2</sub> Fuc <sub>4</sub> Hex <sub>22</sub> HexNAC <sub>21</sub> | 11131.0 | 0.06 |
| NeuAc <sub>1</sub> Fuc <sub>1</sub> Hex <sub>24</sub> HexNAC <sub>23</sub> | 11146.4 | 0.04 |
| NeuAc <sub>4</sub> Hex <sub>22</sub> HexNAC <sub>21</sub>                  | 11159.4 | 0.04 |
| NeuAc <sub>1</sub> Fuc <sub>5</sub> Hex <sub>22</sub> HexNAC <sub>22</sub> | 11189.4 | 0.02 |
| NeuAc <sub>2</sub> Fuc <sub>3</sub> Hex <sub>22</sub> HexNAC <sub>22</sub> | 11203.5 | 0.04 |
| NeuAc <sub>1</sub> Fuc <sub>4</sub> Hex <sub>23</sub> HexNAC <sub>22</sub> | 11218.7 | 0.08 |
| NeuAc <sub>2</sub> Fuc <sub>2</sub> Hex <sub>23</sub> HexNAC <sub>22</sub> | 11233.8 | 0.05 |
| NeuAc <sub>3</sub> Hex <sub>23</sub> HexNAC <sub>22</sub>                  | 11246.7 | 0.04 |
| NeuAc <sub>2</sub> Fuc <sub>6</sub> Hex <sub>21</sub> HexNAC <sub>21</sub> | 11275.3 | 0.02 |
| NeuAc <sub>1</sub> Fuc <sub>3</sub> Hex <sub>23</sub> HexNAC <sub>23</sub> | 11290.1 | 0.05 |
| NeuAc <sub>2</sub> Fuc <sub>5</sub> Hex <sub>22</sub> HexNAC <sub>21</sub> | 11304.3 | 0.06 |
| NeuAc <sub>1</sub> Fuc <sub>2</sub> Hex <sub>24</sub> HexNAC <sub>23</sub> | 11319.2 | 0.04 |
| NeuAc <sub>4</sub> Fuc <sub>1</sub> Hex <sub>22</sub> HexNAC <sub>21</sub> | 11332.8 | 0.08 |
| NeuAc <sub>2</sub> Fuc <sub>4</sub> Hex <sub>22</sub> HexNAC <sub>22</sub> | 11378.9 | 0.04 |
| NeuAc <sub>1</sub> Fuc <sub>5</sub> Hex <sub>23</sub> HexNAC <sub>22</sub> | 11393.0 | 0.04 |
| NeuAc <sub>2</sub> Fuc <sub>3</sub> Hex <sub>23</sub> HexNAC <sub>22</sub> | 11406.0 | 0.03 |
| NeuAc <sub>3</sub> Fuc <sub>1</sub> Hex <sub>23</sub> HexNAC <sub>22</sub> | 11420.1 | 0.07 |
| NeuAc <sub>1</sub> Fuc <sub>4</sub> Hex <sub>23</sub> HexNAC <sub>23</sub> | 11463.7 | 0.03 |
| NeuAc <sub>2</sub> Fuc <sub>6</sub> Hex <sub>22</sub> HexNAC <sub>21</sub> | 11479.0 | 0.04 |
| NeuAc <sub>1</sub> Fuc <sub>3</sub> Hex <sub>24</sub> HexNAC <sub>23</sub> | 11494.6 | 0.04 |
| NeuAc <sub>2</sub> Fuc <sub>1</sub> Hex <sub>24</sub> HexNAC <sub>23</sub> | 11508.4 | 0.05 |
| NeuAc <sub>2</sub> Fuc <sub>5</sub> Hex <sub>22</sub> HexNAC <sub>22</sub> | 11552.2 | 0.02 |
| NeuAc <sub>1</sub> Fuc <sub>6</sub> Hex <sub>23</sub> HexNAC <sub>22</sub> | 11567.1 | 0.03 |
| NeuAc <sub>2</sub> Fuc <sub>4</sub> Hex <sub>23</sub> HexNAC <sub>22</sub> | 11580.1 | 0.06 |
| NeuAc <sub>1</sub> Fuc <sub>1</sub> Hex <sub>25</sub> HexNAC <sub>24</sub> | 11595.7 | 0.03 |
| NeuAc <sub>1</sub> Fuc <sub>5</sub> Hex <sub>23</sub> HexNAC <sub>23</sub> | 11638.4 | 0.02 |
| NeuAc <sub>1</sub> Fuc <sub>4</sub> Hex <sub>24</sub> HexNAC <sub>23</sub> | 11668.8 | 0.04 |
| NeuAc <sub>2</sub> Fuc <sub>2</sub> Hex <sub>24</sub> HexNAC <sub>23</sub> | 11683.4 | 0.03 |
| NeuAc <sub>3</sub> Hex <sub>24</sub> HexNAC <sub>23</sub>                  | 11694.9 | 0.05 |
| NeuAc <sub>1</sub> Fuc <sub>3</sub> Hex <sub>24</sub> HexNAC <sub>24</sub> | 11740.0 | 0.04 |
| NeuAc <sub>2</sub> Fuc <sub>5</sub> Hex <sub>23</sub> HexNAC <sub>22</sub> | 11754.0 | 0.05 |
| NeuAc <sub>1</sub> Fuc <sub>2</sub> Hex <sub>25</sub> HexNAC <sub>24</sub> | 11768.2 | 0.03 |
| NeuAc <sub>4</sub> Fuc <sub>1</sub> Hex <sub>23</sub> HexNAC <sub>22</sub> | 11782.4 | 0.04 |
| NeuAc <sub>1</sub> Fuc <sub>5</sub> Hex <sub>24</sub> HexNAC <sub>23</sub> | 11842.2 | 0.03 |
| NeuAc <sub>2</sub> Fuc <sub>3</sub> Hex <sub>24</sub> HexNAC <sub>23</sub> | 11856.2 | 0.03 |
| NeuAc <sub>3</sub> Fuc <sub>1</sub> Hex <sub>24</sub> HexNAC <sub>23</sub> | 11870.0 | 0.06 |
| NeuAc <sub>1</sub> Fuc <sub>3</sub> Hex <sub>25</sub> HexNAC <sub>24</sub> | 11942.8 | 0.03 |
| NeuAc <sub>2</sub> Fuc <sub>1</sub> Hex <sub>25</sub> HexNAC <sub>24</sub> | 11958.2 | 0.03 |

**Percentage values of structural features (%)**

|                           |        |
|---------------------------|--------|
| <b>Total percentage</b>   | 263.50 |
| <b>Sialylation</b>        |        |
| non-sialylated            | 62.42  |
| total sialylated          | 201.18 |
| 1-sia                     | 54.66  |
| 2-sia                     | 124.07 |
| 3-sia                     | 19.40  |
| 4-sia                     | 2.97   |
| <b>Fucosylation</b>       |        |
| non-fucosylated           | 166.33 |
| total fucosylated         | 97.17  |
| 1-fuc                     | 76.67  |
| 2-fuc                     | 15.06  |
| 3-fuc                     | 4.47   |
| 4-fuc                     | 0.68   |
| 5-fuc                     | 0.19   |
| <b>Bisection</b>          |        |
| non-bisected              | 249.48 |
| total bisected            | 14.02  |
| sialylated, bisected      | 3.49   |
| non-sialylated, bisected  | 10.53  |
| fucosylated, bisected     | 11.22  |
| non-fucosylated, bisected | 2.80   |

**Endo H released total N-glycan (1000-3000)**

| <b>Composition</b>                                      | <b>Observed monoisotopic Mass (m/z)</b> | <b>Relative abundance (%)</b> |
|---------------------------------------------------------|-----------------------------------------|-------------------------------|
| Hex <sub>4</sub> HexNAc <sub>1</sub>                    | 1130.5                                  | 10.75                         |
| Hex <sub>5</sub> HexNAc <sub>1</sub>                    | 1334.8                                  | 100.00                        |
| Hex <sub>6</sub> HexNAc <sub>1</sub>                    | 1538.7                                  | 93.47                         |
| Hex <sub>5</sub> HexNAc <sub>2</sub>                    | 1579.8                                  | 8.08                          |
| Hex <sub>6</sub> HexNAc <sub>1</sub> ⊕                  | 1640.7                                  | 2.03                          |
| Hex <sub>7</sub> HexNAc <sub>1</sub>                    | 1742.9                                  | 63.71                         |
| Hex <sub>6</sub> HexNAc <sub>2</sub>                    | 1783.9                                  | 5.28                          |
| Hex <sub>5</sub> HexNAc <sub>3</sub>                    | 1824.9                                  | 9.93                          |
| Hex <sub>7</sub> HexNAc <sub>1</sub> ⊕                  | 1844.8                                  | 1.04                          |
| NeuAc <sub>1</sub> Hex <sub>5</sub> HexNAc <sub>2</sub> | 1941.0                                  | 2.94                          |
| Hex <sub>8</sub> HexNAc <sub>1</sub>                    | 1947.0                                  | 59.28                         |
| Fuc <sub>1</sub> Hex <sub>6</sub> HexNAc <sub>2</sub>   | 1958.0                                  | 0.55                          |
| Hex <sub>7</sub> HexNAc <sub>2</sub>                    | 1988.0                                  | 0.41                          |
| Fuc <sub>1</sub> Hex <sub>5</sub> HexNAc <sub>3</sub>   | 1999.0                                  | 0.45                          |
| Hex <sub>6</sub> HexNAc <sub>3</sub>                    | 2029.0                                  | 5.77                          |
| NeuAc <sub>1</sub> Hex <sub>6</sub> HexNAc <sub>2</sub> | 2145.0                                  | 3.11                          |
| Hex <sub>9</sub> HexNAc <sub>1</sub>                    | 2151.0                                  | 46.26                         |
| NeuAc <sub>1</sub> Hex <sub>5</sub> HexNAc <sub>3</sub> | 2186.1                                  | 1.17                          |

|                                                                          |        |      |
|--------------------------------------------------------------------------|--------|------|
| Fuc <sub>1</sub> Hex <sub>6</sub> HexNAc <sub>3</sub>                    | 2203.1 | 0.19 |
| Hex <sub>7</sub> HexNAc <sub>3</sub>                                     | 2233.1 | 0.84 |
| NeuAc <sub>1</sub> Fuc <sub>1</sub> Hex <sub>6</sub> HexNAc <sub>2</sub> | 2319.1 | 0.08 |
| NeuAc <sub>1</sub> Hex <sub>7</sub> HexNAc <sub>2</sub>                  | 2349.2 | 0.19 |
| Hex <sub>10</sub> HexNAc <sub>1</sub>                                    | 2355.2 | 0.79 |
| NeuAc <sub>1</sub> Hex <sub>6</sub> HexNAc <sub>3</sub>                  | 2390.2 | 0.55 |
| Hex <sub>7</sub> HexNAc <sub>4</sub>                                     | 2478.2 | 0.10 |
| NeuAc <sub>1</sub> Hex <sub>6</sub> HexNAc <sub>3</sub>                  | 2595.3 | 0.15 |
| Fuc <sub>1</sub> Hex <sub>7</sub> HexNAc <sub>4</sub>                    | 2652.3 | 0.02 |
| NeuAc <sub>1</sub> Hex <sub>6</sub> HexNAc <sub>4</sub>                  | 2840.4 | 0.05 |

**Endo H released phosphorylated N-glycan (1500-3000)**

| <b>Composition</b>                                  | <b>Observed monoisotopic Mass (m/z)</b> | <b>Relative abundance (%)</b> |
|-----------------------------------------------------|-----------------------------------------|-------------------------------|
| Hex <sub>6</sub> HexNAc <sub>1</sub> @              | 1640.9                                  | 100.00                        |
| Hex <sub>7</sub> HexNAc <sub>1</sub> @              | 1845.1                                  | 63.91                         |
| Hex <sub>6</sub> HexNAc <sub>2</sub> @              | 1886.1                                  | 4.63                          |
| Hex <sub>6</sub> HexNAc <sub>1</sub> @ <sub>2</sub> | 1947.2                                  | 5.15                          |
| Hex <sub>8</sub> HexNAc <sub>1</sub> @              | 2049.2                                  | 12.70                         |
| Hex <sub>7</sub> HexNAc <sub>2</sub> @              | 2090.2                                  | 29.66                         |
| Hex <sub>8</sub> HexNAc <sub>1</sub> @ <sub>2</sub> | 2151.3                                  | 8.46                          |
| Hex <sub>7</sub> HexNAc <sub>2</sub> @ <sub>2</sub> | 2192.3                                  | 3.12                          |
| Hex <sub>9</sub> HexNAc <sub>1</sub> @              | 2253.3                                  | 6.00                          |
| Hex <sub>8</sub> HexNAc <sub>2</sub> @ <sub>2</sub> | 2395.4                                  | 8.76                          |
| Hex <sub>9</sub> HexNAc <sub>3</sub> @ <sub>2</sub> | 2844.7                                  | 5.30                          |

**Supplementary Table 2** List of assigned peaks of human lung N-glycans from GC-MS linkage analysis

| <b>RT</b> | <b>Assignment</b> | <b>Signature fragments</b>             | <b>Relative abundance</b> |
|-----------|-------------------|----------------------------------------|---------------------------|
| 12.34     | t-Fuc             | 102, 115, 118, 131, 175                | 0.20                      |
| 13.81     | t-Man             | 102, 118, 129, 145, 161, 162, 205      | 0.65                      |
| 14.08     | t-Gal             | 102, 118, 129, 145, 161, 162, 205      | 0.41                      |
| 14.94     | 2-Man             | 129, 130, 161, 190                     | 1.00                      |
| 15.21     | 2-Gal             | 129, 130, 145, 161, 174, 190, 205      | 0.05                      |
| 15.27     | 3-Gal             | 118, 129, 234, 161, 277                | 0.33                      |
| 15.77     | 6-Gal             | 99, 102, 118, 129, 162, 189, 233       | 0.51                      |
| 16.11     | 2,4-Man           | 130, 190, 233                          | 0.10                      |
| 16.53     | 2,6-Man           | 129, 130, 189, 190                     | 0.10                      |
| 16.71     | 3,6-Man           | 118, 129, 189, 234                     | 0.39                      |
| 17.12     | 3,4,6-Man         | 97, 118, 139, 160, 171                 | 0.04                      |
| 17.57     | t-GlcNAc          | 113, 117, 129, 143, 145, 159, 161, 203 | 0.05                      |
| 18.43     | 4-linked GlcNAc   | 117, 159, 143, 233                     | 0.81                      |
| 19.27     | 3,4-linked GlcNAc | 117, 142, 159, 172, 301                | 0.06                      |
| 19.75     | 4,6-linked GlcNAc | 117, 159, 261                          | 0.11                      |

**Supplementary Table 3** List of assigned peaks of human lung O-glycans from MALDI-TOF-MS analysis

| <b>Composition</b>                                                       | <b>Observed Mass/Charge (m/z)</b> | <b>Relative abundance / %</b> |
|--------------------------------------------------------------------------|-----------------------------------|-------------------------------|
| Hex <sub>1</sub> HexNAC <sub>1</sub>                                     | 534.3                             | 5.10                          |
| NeuAc <sub>1</sub> Hex <sub>1</sub> HexNAC <sub>1</sub>                  | 896.5                             | 65.93                         |
| Hex <sub>2</sub> HexNAC <sub>2</sub>                                     | 983.6                             | 3.65                          |
| NeuAc <sub>2</sub> Hex <sub>1</sub> HexNAC <sub>1</sub>                  | 1256.8                            | 100.00                        |
| NeuAc <sub>1</sub> Hex <sub>2</sub> HexNAC <sub>2</sub>                  | 1344.9                            | 14.33                         |
| NeuAc <sub>1</sub> Fuc <sub>1</sub> Hex <sub>2</sub> HexNAC <sub>2</sub> | 1519.0                            | 1.23                          |
| NeuAc <sub>3</sub> Hex <sub>1</sub> HexNAC <sub>1</sub>                  | 1618.1                            | 1.64                          |
| NeuAc <sub>2</sub> Hex <sub>2</sub> HexNAC <sub>2</sub>                  | 1706.1                            | 4.08                          |
| NeuAc <sub>1</sub> Hex <sub>3</sub> HexNAC <sub>3</sub>                  | 1794.2                            | 0.54                          |
| NeuAc <sub>1</sub> Fuc <sub>1</sub> Hex <sub>3</sub> HexNAC <sub>3</sub> | 1968.3                            | 0.14                          |

**Supplementary Table 4** List of assigned peaks of human lung GSLs from MALDI-TOF-MS analysis

| <b>Composition</b>                                                       | <b>Observed Mass/Charge (m/z)</b> | <b>Relative abundance / %</b> |
|--------------------------------------------------------------------------|-----------------------------------|-------------------------------|
| NeuAc <sub>1</sub> Hex <sub>1</sub> HexNAc <sub>1</sub>                  | 854.6                             | 100.00                        |
| Hex <sub>3</sub> HexNAc <sub>1</sub>                                     | 942.6                             | 60.73                         |
| Fuc <sub>1</sub> Hex <sub>3</sub> HexNAc <sub>1</sub>                    | 1116.8                            | 7.08                          |
| NeuAc <sub>2</sub> Hex <sub>1</sub> HexNAc <sub>1</sub>                  | 1215.9                            | 68.74                         |
| NeuAc <sub>1</sub> Hex <sub>3</sub> HexNAc <sub>1</sub>                  | 1304.0                            | 80.28                         |
| Hex <sub>4</sub> HexNAc <sub>2</sub>                                     | 1392.0                            | 11.30                         |
| NeuAc <sub>1</sub> Fuc <sub>1</sub> Hex <sub>3</sub> HexNAc <sub>1</sub> | 1478.1                            | 1.25                          |
| Fuc <sub>1</sub> Hex <sub>4</sub> HexNAc <sub>2</sub>                    | 1566.1                            | 6.07                          |
| NeuAc <sub>2</sub> Hex <sub>3</sub> HexNAc <sub>1</sub>                  | 1665.2                            | 1.44                          |
| NeuAc <sub>1</sub> Hex <sub>4</sub> HexNAc <sub>2</sub>                  | 1753.2                            | 30.86                         |
| Hex <sub>5</sub> HexNAc <sub>3</sub>                                     | 1841.3                            | 6.27                          |
| NeuAc <sub>1</sub> Fuc <sub>1</sub> Hex <sub>4</sub> HexNAc <sub>2</sub> | 1927.4                            | 0.40                          |
| Fuc <sub>1</sub> Hex <sub>5</sub> HexNAc <sub>3</sub>                    | 2015.4                            | 4.80                          |
| NeuAc <sub>2</sub> Hex <sub>4</sub> HexNAc <sub>2</sub>                  | 2114.4                            | 0.22                          |
| NeuAc <sub>1</sub> Hex <sub>5</sub> HexNAc <sub>3</sub>                  | 2202.5                            | 11.15                         |
| Hex <sub>6</sub> HexNAc <sub>4</sub>                                     | 2290.6                            | 0.46                          |
| NeuAc <sub>1</sub> Fuc <sub>1</sub> Hex <sub>5</sub> HexNAc <sub>3</sub> | 2376.6                            | 3.10                          |
| Fuc <sub>1</sub> Hex <sub>6</sub> HexNAc <sub>4</sub>                    | 2464.7                            | 1.25                          |
| NeuAc <sub>1</sub> Fuc <sub>2</sub> Hex <sub>5</sub> HexNAc <sub>3</sub> | 2550.8                            | 0.34                          |
| NeuAc <sub>2</sub> Hex <sub>5</sub> HexNAc <sub>3</sub>                  | 2563.8                            | 0.83                          |
| Fuc <sub>2</sub> Hex <sub>6</sub> HexNAc <sub>4</sub>                    | 2638.8                            | 1.78                          |
| NeuAc <sub>1</sub> Hex <sub>6</sub> HexNAc <sub>4</sub>                  | 2651.8                            | 0.54                          |
| Hex <sub>7</sub> HexNAc <sub>5</sub>                                     | 2739.8                            | 0.12                          |
| Fuc <sub>3</sub> Hex <sub>6</sub> HexNAc <sub>4</sub>                    | 2812.9                            | 0.96                          |
| NeuAc <sub>1</sub> Fuc <sub>1</sub> Hex <sub>6</sub> HexNAc <sub>4</sub> | 2825.9                            | 1.64                          |
| Fuc <sub>1</sub> Hex <sub>7</sub> HexNAc <sub>5</sub>                    | 2914.1                            | 0.06                          |
| NeuAc <sub>1</sub> Fuc <sub>2</sub> Hex <sub>6</sub> HexNAc <sub>4</sub> | 3000.1                            | 0.36                          |
| Fuc <sub>2</sub> Hex <sub>7</sub> HexNAc <sub>5</sub>                    | 3088.2                            | 0.18                          |
| NeuAc <sub>1</sub> Fuc <sub>3</sub> Hex <sub>6</sub> HexNAc <sub>4</sub> | 3174.3                            | 0.02                          |
| Fuc <sub>3</sub> Hex <sub>7</sub> HexNAc <sub>5</sub>                    | 3262.3                            | 0.22                          |
| NeuAc <sub>1</sub> Fuc <sub>1</sub> Hex <sub>7</sub> HexNAc <sub>5</sub> | 3275.3                            | 0.09                          |
| NeuAc <sub>1</sub> Fuc <sub>2</sub> Hex <sub>7</sub> HexNAc <sub>5</sub> | 3449.5                            | 0.50                          |
| NeuAc <sub>1</sub> Fuc <sub>3</sub> Hex <sub>7</sub> HexNAc <sub>5</sub> | 3623.6                            | 0.10                          |
| Fuc <sub>3</sub> Hex <sub>8</sub> HexNAc <sub>6</sub>                    | 3711.7                            | 0.02                          |
| NeuAc <sub>1</sub> Fuc <sub>1</sub> Hex <sub>8</sub> HexNAc <sub>6</sub> | 3724.7                            | 0.01                          |
| Fuc <sub>4</sub> Hex <sub>8</sub> HexNAc <sub>6</sub>                    | 3884.8                            | 0.01                          |
| NeuAc <sub>1</sub> Fuc <sub>2</sub> Hex <sub>8</sub> HexNAc <sub>6</sub> | 3899.0                            | 0.01                          |
| NeuAc <sub>1</sub> Fuc <sub>3</sub> Hex <sub>8</sub> HexNAc <sub>6</sub> | 4073.1                            | 0.01                          |
| Fuc <sub>3</sub> Hex <sub>9</sub> HexNAc <sub>7</sub>                    | 4161.1                            | <0.01                         |
| NeuAc <sub>1</sub> Fuc <sub>4</sub> Hex <sub>8</sub> HexNAc <sub>6</sub> | 4247.2                            | <0.01                         |
| Fuc <sub>4</sub> Hex <sub>9</sub> HexNAc <sub>7</sub>                    | 4335.3                            | <0.01                         |
| NeuAc <sub>1</sub> Fuc <sub>2</sub> Hex <sub>9</sub> HexNAc <sub>7</sub> | 4348.3                            | <0.01                         |
| NeuAc <sub>1</sub> Fuc <sub>3</sub> Hex <sub>9</sub> HexNAc <sub>7</sub> | 4522.5                            | <0.01                         |
| NeuAc <sub>1</sub> Fuc <sub>4</sub> Hex <sub>9</sub> HexNAc <sub>7</sub> | 4695.5                            | <0.01                         |

**Supplementary Table 5.** Summary of influenza virus IHC staining results from literature

| Ref                  | Year | First Author | Journal                  | Lectin<br>$\alpha$ 2,6-Sia | Lectin<br>$\alpha$ 2,3-Sia | Tissue  | Preparation  | SNA result | MAL result                                                                         |
|----------------------|------|--------------|--------------------------|----------------------------|----------------------------|---------|--------------|------------|------------------------------------------------------------------------------------|
| <b>Human Tissue</b>  |      |              |                          |                            |                            |         |              |            |                                                                                    |
| 35                   | 2007 | Nicholls     | Respiratory Research     | SNA                        | MAA-I/MAA-II               | N/B/L   | FFPE         | + N/B/L    | + N/B (MAA-I) +L macrophages and pneumocytes (MAA-I) +L pneumocytes (MAA-II)       |
| 23                   | 2006 | Shinya       | Nature                   | SNA                        | MAA                        | L       | FFPE         | + B/N/T    | + broncheoli/ alveoli                                                              |
| 34                   | 1993 | Couceiro     | Virus Research           | SNA                        | MAA                        | T       | FFPE         | + T        | + mucin droplets in goblet cells                                                   |
| 36                   | 2018 | Eriksson     | Scientific Reports       | SNA                        | MAA-II                     | N/B/L   | FFPE         | + N/B/L    | + L pneumocytes/ macrophages                                                       |
| <b>Animal tissue</b> |      |              |                          |                            |                            |         |              |            |                                                                                    |
| 33                   | 2010 | Van Poucke   | Virology Journal         | SNA                        | MAL-I/ MAL-II//MAA         | B/N/L/T | FFPE/ Frozen | + N/T/B/L  | + N/T/B glands (MAL-I), -N/T/B/L epithelial/ L glands (MAL-1), + N/T epithelial/ B |
| 37                   | 2000 | Suzuki       | Journal of Virology      | SNA                        | MAA                        | T       | Frozen       | -          | +                                                                                  |
| 39                   | 2009 | Ning         | Veterinary Research Comm | SNA                        | MAA-II                     | N/T/LRT | FFPE         | + T/LRT/   | + T/LRT                                                                            |
| 38                   | 2011 | Trebbien     | Virology Journal         | SNA                        | MAA-I/MAA-II               | N/T/B/L | FFPE         | + N/T/B/L  | + L (MAAII)                                                                        |
|                      |      | B            | Bronchus                 |                            |                            |         |              |            |                                                                                    |
|                      |      | N            | Nasal                    |                            |                            |         |              |            |                                                                                    |
|                      |      | L            | Lung                     |                            |                            |         |              |            |                                                                                    |
|                      |      | LRT          | Lower respiratory tract  |                            |                            |         |              |            |                                                                                    |
|                      |      | T            | Trachea                  |                            |                            |         |              |            |                                                                                    |
|                      |      | +            | Postive staining         |                            |                            |         |              |            |                                                                                    |
|                      |      | -            | Negative staining        |                            |                            |         |              |            |                                                                                    |
